# Supplementary material for: Revolutionizing green catalysis: a novel amla seed derived biochar modified g-C3N4·SO3H catalyst for sustainable and versatile synthesis of bis-indoles
Source: Royal Society of Chemistry journal article supplement (doi:10.1039/d4na00891j), 2025-01-01
Supplement: d4na00891j1.pdf [file d4na00891j1.pdf]

# **Revolutionizing Green Catalysis: A Novel Amla Seeds Derived Biochar Modified g-C<sub>3</sub>N<sub>4</sub>·SO<sub>3</sub>H Catalyst for Sustainable and Versatile Synthesis of Bis-Indoles**

Shivani Soni<sup>1</sup>, Sunita Teli<sup>1</sup>, Pankaj Teli<sup>1</sup>, Shikha Agarwal<sup>1\*</sup>

<sup>1</sup>Synthetic Organic Chemistry Laboratory, Department of Chemistry, Mohanlal Sukhadia  
University, Udaipur-313001, Rajasthan, India

E-mail: [shikhaagarwal@mlsu.ac.in](mailto:shikhaagarwal@mlsu.ac.in)

## **Table of Contents**

|                                                                      |    |
|----------------------------------------------------------------------|----|
| 1. Experimental Section: .....                                       | 2  |
| 1.1. Material and methods: .....                                     | 2  |
| General procedure for the synthesis of Bis-indole derivatives:.....  | 2  |
| 2. Green Chemistry Metrics:.....                                     | 3  |
| 3. Gram scale synthesis:.....                                        | 5  |
| 4. NMR and Mass spectra of synthesized bis-indole derivatives: ..... | 6  |
| 5. References:.....                                                  | 39 |

## **1. Experimental Section:**

### **1.1. Material and methods:**

The chemicals used in this study were sourced from Sigma-Aldrich, Loba-Chemie, and Merck, ensuring high quality. They were utilized as received, without additional purification, underscoring their exceptional purity. Melting points were precisely measured using an electric thermal melting point apparatus. The reaction progress was monitored using thin-layer chromatography on advanced silica gel 60 RP-18 F254S plates, with visualization under UV lamps. The catalyst's IR spectrum was meticulously recorded with a Bruker FTIR spectrometer, providing detailed chemical composition analysis. X-ray diffraction (XRD) data were acquired with the Rigaku Ultima IV diffractometer, delivering precise information on crystalline properties. Comprehensive characterization included Scanning Electron Microscopy (SEM) and Energy-dispersive X-ray spectroscopy (EDX), and Mapping using the F E I Quanta FEG 200 system, which offered detailed insights into the catalyst's morphology and structure. Thermal stability and composition were analyzed using TGA/DTA on the Hitachi NEXTA STA300 system. Additionally,  $^1\text{H}$  and  $^{13}\text{C}$  NMR spectra were recorded with high accuracy using the JEOL 400 MHz instrument, with  $\text{CDCl}_3$  and  $\text{DMSO-d}_6$  as solvents and TMS as the internal standard, ensuring reliable structural elucidation.

### **General procedure for the synthesis of Bis-indole derivatives:**

In a 25 mL round-bottom flask, 4 mL of water was combined with 0.5 mmol of indole and 0.25 mmol of a second reactant containing carbonyl group such as isatins, aldehydes, acetophenone, cyclo-ketones, or dimedone along with 20 mg of BCNSA catalyst. The mixture was stirred at room temperature or under reflux for an appropriate duration, with the reaction progress monitored by TLC. During the reaction, the color of the mixture exhibited a notable transformation, shifting from lighter to darker shades, and in some cases, changing from white to dark red, pink, or orange upon completion. After the reaction, the mixture was dried under vacuum, and the catalyst was removed using methanol. The filtrate was dried, washed with lukewarm water to remove any residual impurities, and dried again. The melting point of the final product was determined, followed by analysis using melting point,  $^1\text{H}$  and  $^{13}\text{C}$  NMR spectroscopy to confirm its purity and verify successful synthesis.

## 2. Green Chemistry Metrics:

The green chemistry metrics for all synthesized compounds has been determined using the corresponding parameters of each compound<sup>1, 2</sup> (**Table S1**).

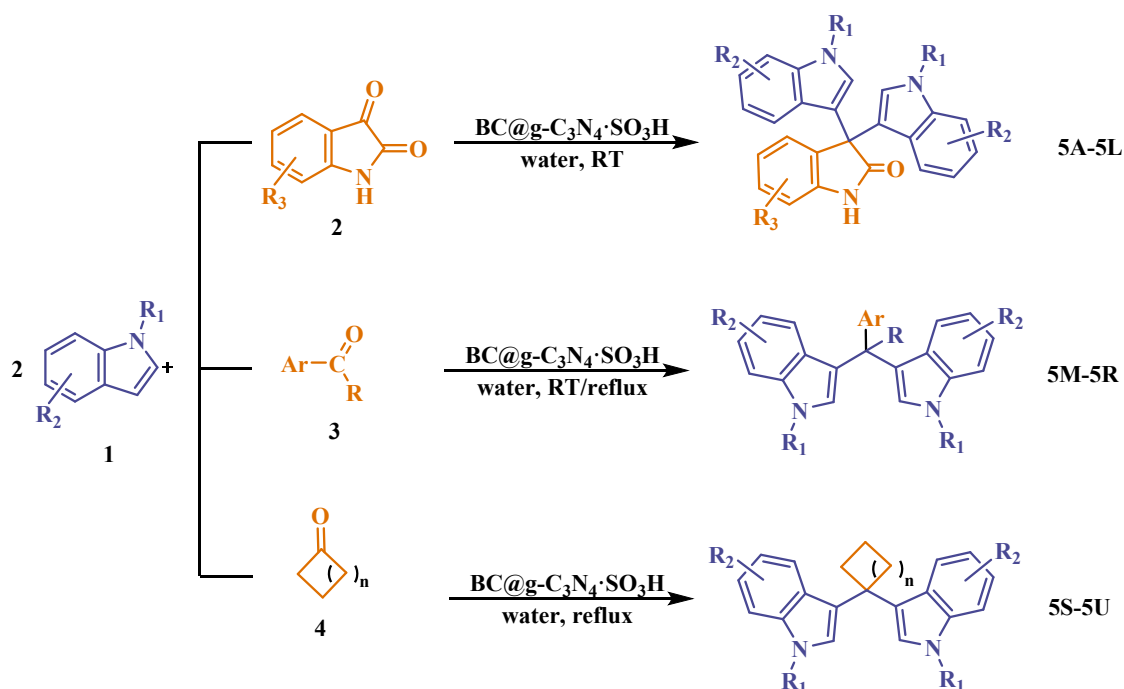

### Environmental factor (E-factor)

E-factor = mass of waste/ mass of product

Where the mass of waste = total mass of raw materials minus the total mass of the product

### Atom-economy (AE)

The ideal value of the AE factor is 100% means all starting material is converted into the product.

$$AE = \text{MW of product} \div \Sigma (\text{MW of stoichiometric reactants}) \times 100$$

### Process mass intensity (PMI)

$$PMI = \Sigma (\text{mass of stoichiometric reactants} + \text{solvent}) / \text{mass of product}$$

### Reaction mass efficiency (RME)

$$RME = \text{mass of product} / \Sigma (\text{mass of stoichiometric reactants}) \times 100$$

(Higher value measures the **cleanness** of reaction)

### Eco-score (E-score)

Ideal reactions Eco-score value is 100.

Eco-scale from 0 to 100 using the following scores: > 75, excellent; > 50, acceptable; and < 50, inadequate.

E-score has been calculated for the reaction based on the following 6 parameters below.

| S. No. | Parameter                           |
|--------|-------------------------------------|
| 1      | Yield                               |
| 2      | Price of the reaction component     |
| 3      | Safety (Reactant) <sup>a</sup>      |
| 4      | Technical setup                     |
| 5      | Temperature /time                   |
| 6      | Workup and purification             |
|        | Total penalty points                |
|        | Based on the hazard warning symbols |

Eco-Score = 100 – the sum of individual penalties

(>75, excellent synthesis)

**Table S1:**Green chemistry matrix of synthesized bis-indole scaffolds.

| Code      | Yield (%)    | E factor        | AE (%)   | RME             | PMI             | Eco-Score    |
|-----------|--------------|-----------------|----------|-----------------|-----------------|--------------|
| <b>5A</b> | 85.47        | 0.216174        | 96.20341 | 82.22505        | 1.228915        | 72.735       |
| <b>5B</b> | 83.62        | 0.242039        | 96.28408 | 80.51275        | 1.254021        | 71.81        |
| <b>5C</b> | 96.26        | 0.082974        | 95.92595 | 92.33832        | 1.095022        | 78.13        |
| <b>5D</b> | 95.86        | 0.089335        | 95.7637  | 91.79909        | 1.102083        | 77.93        |
| <b>5E</b> | <b>98.48</b> | <b>0.064164</b> | 95.42086 | <b>93.97046</b> | 1.077486        | <b>79.24</b> |
| <b>5F</b> | 95.02        | 0.09524         | 96.08948 | 91.30422        | 1.106457        | 77.51        |
| <b>5G</b> | 98.11        | 0.066427        | 95.57749 | 93.77108        | <b>1.079455</b> | 79.055       |
| <b>5H</b> | 97.65        | 0.075644        | 95.20489 | 92.96757        | 1.089744        | 78.825       |
| <b>5I</b> | 96.85        | 0.07766         | 95.8117  | 92.79363        | 1.089365        | 78.425       |
| <b>5J</b> | 88.53        | 0.177983        | 95.88939 | 84.89087        | 1.19056         | 74.265       |
| <b>5K</b> | 81.57        | 0.280688        | 95.72517 | 78.08302        | 1.294908        | 70.785       |
| <b>5L</b> | 89.77        | 0.158256        | 96.17543 | 86.33668        | 1.169199        | 74.885       |
| <b>5M</b> | 94.03        | 0.115527        | 95.33522 | 89.6437         | 1.129855        | 77.015       |

|           |              |                 |                 |                 |                 |               |
|-----------|--------------|-----------------|-----------------|-----------------|-----------------|---------------|
| <b>5N</b> | 83.12        | 0.249228        | <b>96.30585</b> | 80.04942        | 1.261913        | 71.56         |
| <b>5O</b> | 91.06        | 0.144867        | 95.92177        | 87.34636        | 1.157751        | 75.53         |
| <b>5P</b> | 96.13        | 0.087711        | 95.63735        | 91.93619        | 1.100676        | 78.065        |
| <b>5Q</b> | 87.78        | 0.1879          | 95.90134        | 84.1822         | 1.201327        | 73.89         |
| <b>5R</b> | 84.97        | 0.233239        | 95.43046        | 81.08726        | 1.248798        | 72.485        |
| <b>5S</b> | 95.43        | 0.105585        | <b>94.78138</b> | 90.44987        | 1.121549        | 77.715        |
| <b>5T</b> | 93.51        | 0.125873        | 94.98446        | 88.81997        | 1.141498        | 76.755        |
| <b>5U</b> | <b>80.01</b> | <b>0.308722</b> | 95.50109        | <b>76.41043</b> | <b>1.324987</b> | <b>70.005</b> |

This method demonstrates outstanding green metrics, including a low E-factor (0.064–0.30), high atom economy (94.78–96.30%), excellent reaction mass efficiency (76.41–93.97%), and superior process mass intensity (1.07–1.32). Furthermore, the eco-score (70–79.24) highlights its minimal environmental footprint. These findings underscore the potential of BCNSA catalysts in advancing sustainable, eco-friendly synthesis, offering an efficient approach with minimal environmental impact.

### 3. Gram scale synthesis:

We tested this methodology for its potential industrial application by performing a gram-scale synthesis using 1-methylindole and 7-(trifluoromethyl)isatin at room temperature with 20 mg of catalyst, using water as the sole solvent. The reaction was completed in just 35 minutes, as monitored by TLC. Notably, upon completion of the reaction, the mixture underwent a distinct color change to hot pink. This color shift is characteristic of the process, though the specific hue may vary depending on the reactants involved. After the reaction, the mixture was filtered to remove the catalyst, which was then washed away with acetone. The filtrate was dried, rinsed with lukewarm water, and dried again. The yield was calculated to be 81.97% (1.72 g).

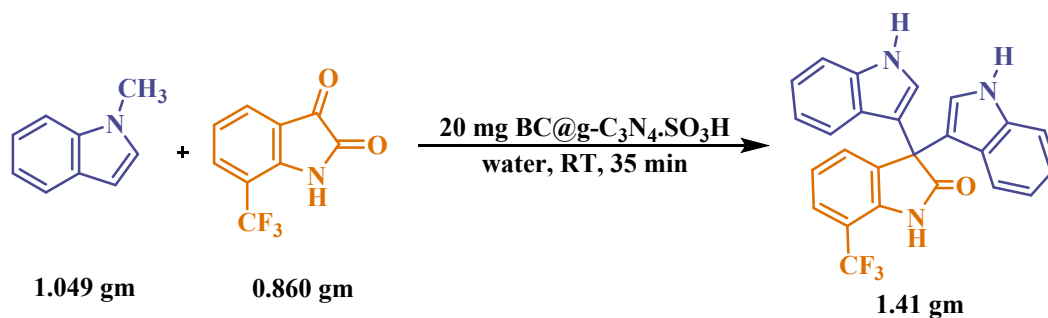

### 4. NMR and Mass spectra of synthesized bis-indole derivatives:

**5A: 1,1''-dimethyl-7'-(trifluoromethyl)-1H,1''H-[3,3':3',3''-terindol]-2'(1'H)-one**

Saffron coloured powder, M.P.: 230-234 °C, <sup>1</sup>H NMR (400 MHz, DMSO-d<sub>6</sub>) δ 11.11 (s, 1H, NH), 7.51 (d, *J* = 7.9 Hz, 1H, ArH), 7.46 (d, *J* = 7.3 Hz, 1H, ArH), 7.37 (s, 1H, ArH), 7.35 (s, 1H, ArH), 7.18 (s, 1H, ArH), 7.16 (s, 1H, ArH), 7.10 – 7.04 (m, 3H, ArH), 6.86 (s, 2H, ArH), 6.84 – 6.80 (m, 2H, ArH), 3.68 (s, 6H, N-CH<sub>3</sub>). <sup>13</sup>C NMR (101 MHz, DMSO-d<sub>6</sub>) δ 179.42, 137.92, 136.65, 129.42, 129.14, 126.28, 122.41, 121.78, 121.15, 119.19, 115.46, 112.91, 110.51, 51.99, 32.91. ESI-MS (*m/z*): 459.1558 [*M*<sup>+</sup>] for C<sub>27</sub>H<sub>20</sub>F<sub>3</sub>N<sub>3</sub>O.

**5B: 6,6''-dichloro-7'-(trifluoromethyl)-1*H*,1''*H*-[3,3':3',3''-terindol]-2'(1'*H*)-one**

Brown solid, M.P.: 182-186 °C, <sup>1</sup>H NMR (400 MHz, DMSO-d<sub>6</sub>) δ 11.19 (d, *J* = 2.2 Hz, 2H, NH), 11.15 (s, 1H, NH), 7.52 (d, *J* = 8.0 Hz, 1H, ArH), 7.45 (d, *J* = 7.4 Hz, 1H, ArH), 7.38 (d, *J* = 1.8 Hz, 2H, ArH), 7.11 (d, *J* = 8.7 Hz, 3H, ArH), 6.86 (d, *J* = 2.5 Hz, 2H, ArH), 6.83 (d, *J* = 1.9 Hz, 1H, ArH), 6.81 (d, *J* = 1.9 Hz, 1H, ArH). <sup>13</sup>C NMR (101 MHz, DMSO-d<sub>6</sub>) δ 179.25, 137.88, 136.15, 127.82, 126.53, 126.02, 124.71, 122.52, 122.16, 119.51, 114.04, 112.70, 111.92, 111.21, 109.99, 109.78, 51.82. ESI-MS (*m/z*): 499.0466 [*M*<sup>+</sup>], Found: 499.0357 for C<sub>25</sub>H<sub>14</sub>Cl<sub>2</sub>F<sub>3</sub>N<sub>3</sub>O.

**5C: 7'-(trifluoromethyl)-1*H*,1''*H*-[3,3':3',3''-terindol]-2'(1'*H*)-one**

Beige coloured powder, M.P.: 242-246 °C<sup>3</sup>, <sup>1</sup>H NMR (400 MHz, DMSO-d<sub>6</sub>) δ 11.09 (s, 1H, NH), 11.03 (d, *J* = 2.1 Hz, 2H, NH), 7.50 (d, *J* = 8.0 Hz, 1H, ArH), 7.45 (d, *J* = 7.4 Hz, 1H, ArH), 7.33 (d, *J* = 8.2 Hz, 2H, ArH), 7.17 (d, *J* = 8.1 Hz, 2H, ArH), 7.08 (t, *J* = 7.7 Hz, 1H, ArH), 7.01 – 6.97 (m, 2H, ArH), 6.82 (d, *J* = 2.5 Hz, 2H, ArH), 6.81 – 6.76 (m, 2H, ArH). <sup>13</sup>C NMR (101 MHz, DMSO-d<sub>6</sub>) δ 179.61, 139.13, 137.47, 136.76, 129.44, 125.95, 124.97, 122.96, 122.27, 121.65, 120.98, 119.00, 113.84, 112.30, 111.01, 52.18. ESI-MS (*m/z*): 431.1245 [*M*<sup>+</sup>] for C<sub>25</sub>H<sub>16</sub>F<sub>3</sub>N<sub>3</sub>O.

**5D: 5'-fluoro-1,1''-dimethyl-1*H*,1''*H*-[3,3':3',3''-terindol]-2'(1'*H*)-one**

Beige powder, M.P.: 262-266 °C<sup>4</sup>, <sup>1</sup>H NMR (400 MHz, DMSO-d<sub>6</sub>) δ 10.65 (s, 1H, NH), 7.36 (s, 1H, ArH), 7.34 (s, 1H, ArH), 7.20 (s, 1H, ArH), 7.18 (s, 1H, ArH), 7.07 – 7.03 (m, 3H, ArH), 7.02 – 6.98 (m, 1H, ArH), 6.94 (dd, *J* = 8.4, 4.5 Hz, 1H, ArH), 6.90 (s, 2H, ArH), 6.81 (ddd, *J* = 8.0, 7.1, 0.9 Hz, 2H, ArH), 3.68 (s, 6H, N-CH<sub>3</sub>). <sup>13</sup>C NMR (101 MHz, DMSO-d<sub>6</sub>) δ 178.98, 157.19, 153.46, 137.99, 137.97, 137.82, 136.63, 129.10, 126.36, 121.69, 121.28, 119.09, 113.22, 110.40, 53.40, 32.89. ESI-MS (*m/z*): 409.1590 [*M*<sup>+</sup>] for C<sub>26</sub>H<sub>20</sub>FN<sub>3</sub>O.

**5E: 5'-fluoro-1*H*,1''*H*-[3,3':3',3''-terindol]-2'(1'*H*)-one**

Creamy white solid, M.P.: 258-262 °C<sup>4</sup>, <sup>1</sup>H NMR (400 MHz, DMSO-d<sub>6</sub>) δ 10.99 (d, *J* = 2.3 Hz, 2H, NH), 10.63 (s, 2H, NH), 7.33 (d, *J* = 0.8 Hz, 1H, ArH), 7.31 (d, *J* = 0.8 Hz, 1H, ArH), 7.18 (s, 1H, ArH), 7.16 (s, 1H, ArH), 7.06 – 7.01 (m, 1H, ArH), 7.00 – 6.98 (m, 3H, ArH), 6.97 – 6.92 (m, 1H, ArH), 6.85 (d, *J* = 2.6 Hz, 2H, ArH), 6.78 (ddd, *J* = 8.0, 7.0, 1.0 Hz, 2H, ArH). <sup>13</sup>C NMR (101 MHz, DMSO-d<sub>6</sub>) δ 179.18, 159.62, 157.26, 138.04, 137.43, 136.82, 126.04, 126.03, 126.02, 124.95, 121.56, 121.11, 118.89, 114.12, 112.22, 53.59. ESI-MS (*m/z*): 381.1277 [*M*<sup>+</sup>] for C<sub>24</sub>H<sub>16</sub>FN<sub>3</sub>O.

**5F: 5'-bromo-1,1''-dimethyl-1*H*,1''*H*-[3,3':3',3''-terindol]-2'(1'*H*)-one**

Pale white crystalline solid, M.P.: 284-292 °C<sup>4</sup>, <sup>1</sup>H NMR (400 MHz, DMSO-d<sub>6</sub>) δ 10.77 (s, 1H, NH), 7.40 – 7.37 (m, 2H, ArH), 7.35 (s, 1H, ArH), 7.26 (d, *J* = 2.0 Hz, 1H, ArH), 7.18 (s, 1H, ArH), 7.16 (s, 1H, ArH), 7.08 – 7.04 (m, 2H, ArH), 6.92 (d, *J* = 8.3 Hz, 1H, ArH), 6.89 (s, 2H, ArH), 6.84 – 6.80 (m, 2H, ArH), 3.68 (s, 6H, N-CH<sub>3</sub>). <sup>13</sup>C NMR (101 MHz, DMSO-d<sub>6</sub>) δ 178.59, 141.10, 137.84, 137.35, 131.32, 129.04, 127.84, 126.32, 121.74, 121.19, 119.14, 113.80, 113.09, 112.26, 110.47, 53.11, 32.90. ESI-MS (*m/z*): 469.0790 [*M*<sup>+</sup>] for C<sub>26</sub>H<sub>20</sub>BrN<sub>3</sub>O.

**5G: 1,1''-dimethyl-1*H*,1''*H*-[3,3':3',3''-terindol]-2'(1'*H*)-one**

Snow white powder, M.P.: 282-286 °C<sup>4</sup>, <sup>1</sup>H NMR (400 MHz, DMSO-d<sub>6</sub>) δ 10.61 (s, 1H, NH), 7.35 (s, 1H, ArH), 7.33 (s, 1H, ArH), 7.19 (dd, *J* = 7.7, 4.8 Hz, 4H, ArH), 7.06 – 7.02 (m, 2H, ArH), 6.94 (dd, *J* = 8.2, 0.9 Hz, 1H, ArH), 6.89 (td, *J* = 7.6, 1.0 Hz, 1H, ArH), 6.84 (s, 2H, ArH), 6.80 (ddd, *J* = 8.0, 7.1, 0.9 Hz, 1H, ArH), 3.66 (s, 6H, N-CH<sub>3</sub>). <sup>13</sup>C NMR (101 MHz, DMSO-d<sub>6</sub>) δ 179.08, 141.75, 137.81, 135.00, 128.97, 128.45, 126.51, 125.40, 122.12, 121.52, 118.94, 113.90, 113.88, 110.31, 110.14, 52.88, 32.87. ESI-MS (*m/z*): 391.1685 [*M*<sup>+</sup>] for C<sub>26</sub>H<sub>21</sub>N<sub>3</sub>O.

**5H: 1*H*,1''*H*-[3,3':3',3''-terindol]-2'(1'*H*)-one**

Dull white powder, M.P.: 264-270 °C<sup>4</sup>, <sup>1</sup>H NMR (400 MHz, DMSO-d<sub>6</sub>) δ 10.95 (s, 2H, NH), 10.60 (s, 1H, NH), 7.32 (d, *J* = 8.1 Hz, 2H, ArH), 7.20 (d, *J* = 7.7 Hz, 4H, ArH), 6.97 (dd, *J* = 14.0, 7.3 Hz, 3H, ArH), 6.88 (t, *J* = 7.5 Hz, 1H, ArH), 6.82 (d, *J* = 2.4 Hz, 2H, ArH), 6.76 (t, *J* = 7.5 Hz, 2H, ArH). <sup>13</sup>C NMR (101 MHz, DMSO-d<sub>6</sub>) δ 179.30, 141.84, 137.44, 135.12, 128.38, 126.21, 125.44, 124.81, 122.00, 121.39, 118.76, 114.79, 112.14, 110.10, 53.08. ESI-MS (*m/z*): 363.1372 [*M*<sup>+</sup>] for C<sub>24</sub>H<sub>17</sub>N<sub>3</sub>O.

**5I: 5'-bromo-1*H*,1''*H*-[3,3':3',3''-terindol]-2'(1'*H*)-one**

Light pink solid, M.P.: 238-242 °C<sup>4</sup>, <sup>1</sup>H NMR (400 MHz, DMSO-d<sub>6</sub>) δ 11.01 (d, *J* = 2.0 Hz, 2H, NH), 10.76 (s, 1H, NH), 7.39 (dd, *J* = 8.3, 2.0 Hz, 1H, ArH), 7.33 (d, *J* = 8.2 Hz, 2H, ArH), 7.26 (d, *J* = 1.9 Hz, 1H, ArH), 7.16 (d, *J* = 8.1 Hz, 2H, ArH), 7.00 (dd, *J* = 11.2, 3.9 Hz, 2H, ArH), 6.93 (d, *J* = 8.3 Hz, 1H, ArH), 6.85 (d, *J* = 2.5 Hz, 2H, ArH), 6.79 (t, *J* = 7.5 Hz, 2H, ArH). <sup>13</sup>C NMR (101 MHz, DMSO-d<sub>6</sub>) δ 178.78, 141.19, 137.47, 131.23, 127.87, 125.99, 124.96, 121.61, 121.02, 118.96, 113.98, 113.67, 112.25, 53.30. ESI-MS (*m/z*): 441.0477 [*M*<sup>+</sup>] for C<sub>24</sub>H<sub>16</sub>BrN<sub>3</sub>O.

**5J: 6,6''-dichloro-5'-fluoro-1*H*,1''*H*-[3,3':3',3''-terindol]-2'(1'*H*)-one**

Cream coloured solid, M.P.: 278-282 °C, <sup>1</sup>H NMR (400 MHz, DMSO-d<sub>6</sub>) δ 11.15 (d, *J* = 1.7 Hz, 2H, NH), 10.70 (s, 1H, NH), 7.38 (d, *J* = 1.7 Hz, 2H, ArH), 7.14 (d, *J* = 8.6 Hz, 2H, ArH), 7.08 – 7.00 (m, 2H, ArH), 6.96 – 6.91 (m, 3H, ArH), 6.82 (dd, *J* = 8.6, 1.8 Hz, 2H, ArH). <sup>13</sup>C NMR (101 MHz, DMSO-d<sub>6</sub>) δ 178.81, 159.62, 157.26, 137.98, 137.96, 137.86, 136.19, 136.11, 126.45, 125.98, 124.79, 122.32, 119.40, 114.35, 111.83, 53.23. ESI-MS (*m/z*): 449.0498 [*M*<sup>+</sup>] for C<sub>24</sub>H<sub>14</sub>Cl<sub>2</sub>FN<sub>3</sub>O.

**5K: 6,6''-dichloro-1*H*,1''*H*-[3,3':3',3''-terindol]-2'(1'*H*)-one**

Orange solid, M.P.: 290-294 °C<sup>5</sup>, <sup>1</sup>H NMR (400 MHz, DMSO-d<sub>6</sub>) δ 11.11 (d, *J* = 2.7 Hz, 2H, NH), 10.66 (s, 1H, NH), 7.37 (d, *J* = 2.3 Hz, 3H, ArH), 7.22 – 7.13 (m, 3H, ArH), 6.96 – 6.86 (m, 3H, ArH), 6.80 (dd, *J* = 8.7, 2.1 Hz, 3H, ArH). <sup>13</sup>C NMR (101 MHz, DMSO-d<sub>6</sub>) δ 178.90, 141.73, 137.84, 134.49, 128.63, 126.36, 125.80, 125.33, 124.94, 122.45, 122.21, 119.26, 114.99, 111.77, 110.32, 52.71. ESI-MS (*m/z*): 431.0592 [*M*<sup>+</sup>] for C<sub>24</sub>H<sub>15</sub>Cl<sub>2</sub>N<sub>3</sub>O.

**5L: 5'-bromo-6,6''-dichloro-1*H*,1''*H*-[3,3':3',3''-terindol]-2'(1'*H*)-one**

White solid, M.P.: 268-272 °C, <sup>1</sup>H NMR (400 MHz, DMSO-d<sub>6</sub>) δ 11.16 (d, *J* = 2.1 Hz, 2H, NH), 10.82 (s, 1H, NH), 7.41 – 7.35 (m, 3H, ArH), 7.26 (d, *J* = 1.9 Hz, 1H, ArH), 7.13 (s, 1H, ArH), 7.11 (s, 1H, ArH), 6.91 (dd, *J* = 13.1, 5.4 Hz, 3H, ArH), 6.82 (dd, *J* = 8.6, 1.9 Hz, 2H, ArH). <sup>13</sup>C NMR (101 MHz, DMSO-d<sub>6</sub>) δ 178.42, 141.09, 137.86, 136.83, 131.51, 127.80, 125.99, 124.73, 122.22, 119.46, 114.19, 114.18, 114.17, 113.89, 112.44, 111.90, 52.92. ESI-MS (*m/z*): 508.9697 [*M*<sup>+</sup>] for C<sub>24</sub>H<sub>14</sub>BrCl<sub>2</sub>N<sub>3</sub>O.

**5M: 5-(bis(1-methyl-1*H*-indol-3-yl)methyl)-4-methylthiazole**

Peach coloured solid, M.P.: 238-242 °C, <sup>1</sup>H NMR (400 MHz, CDCl<sub>3</sub>) δ 8.55 (s, 1H, ArH), 7.42 (d, *J* = 7.9 Hz, 2H, ArH), 7.33 (d, *J* = 8.2 Hz, 2H, ArH), 7.25 (t, *J* = 7.5 Hz, 2H, ArH), 7.06 (t,



$J = 7.4$  Hz, 2H, ArH), 6.63 (s, 2H, ArH), 6.11 (s, 1H, CH), 3.70 (s, 6H, N-CH<sub>3</sub>), 2.50 (s, 3H, CH<sub>3</sub>). <sup>13</sup>C NMR (101 MHz, CDCl<sub>3</sub>)  $\delta$  149.87, 148.03, 137.42, 127.81, 127.01, 121.84, 119.78, 119.06, 117.34, 109.43, 32.92, 32.10, 15.44. ESI-MS ( $m/z$ ): 371.1456 [ $M^+$ ], Found: 371.1428 for C<sub>23</sub>H<sub>21</sub>N<sub>3</sub>S.

**5N: 3,3'-(pyren-1-ylmethylene)bis(1-methyl-1H-indole)**

Vine coloured solid, M.P.: 182-186 °C, <sup>1</sup>H NMR (400 MHz, CDCl<sub>3</sub>)  $\delta$  8.47 (d,  $J = 9.4$  Hz, 1H, ArH), 8.18 – 8.14 (m, 2H, ArH), 8.04 – 7.97 (m, 5H, ArH), 7.87 (d,  $J = 8.0$  Hz, 1H, ArH), 7.39 (d,  $J = 7.9$  Hz, 2H, ArH), 7.31 (d,  $J = 8.2$  Hz, 2H, ArH), 7.23 (dd,  $J = 8.1, 0.9$  Hz, 2H, ArH), 7.01 – 6.99 (m, 2H, ArH, 1H, CH), 6.44 (s, 2H, ArH), 3.63 (s, 6H, N-CH<sub>3</sub>). <sup>13</sup>C NMR (101 MHz, CDCl<sub>3</sub>)  $\delta$  138.29, 137.57, 131.49, 131.00, 130.01, 129.25, 128.75, 127.60, 126.80, 125.89, 125.24, 125.13, 125.02, 124.93, 124.91, 123.93, 121.58, 120.14, 118.80, 118.24, 109.24, 36.18, 32.82. ESI-MS ( $m/z$ ): 474.2096 [ $M^+$ ], Found: 474.1881 for C<sub>35</sub>H<sub>26</sub>N<sub>2</sub>.

**5O: 4-(bis(1-methyl-1H-indol-3-yl)methyl)-2,6-dimethoxyphenol**

Light pink powder, M.P.: 166-170 °C<sup>6</sup>, <sup>1</sup>H NMR (400 MHz, CDCl<sub>3</sub>)  $\delta$  7.40 (d,  $J = 7.9$  Hz, 2H, ArH), 7.30 (d,  $J = 8.2$  Hz, 2H, ArH), 7.20 (t,  $J = 7.5$  Hz, 2H, ArH), 7.00 (t,  $J = 7.4$  Hz, 2H, ArH), 6.59 (s, 2H, ArH), 6.53 (s, 2H, ArH), 5.80 (s, 1H, OH), 5.43 (s, 1H, CH), 3.76 (s, 6H, OCH<sub>3</sub>), 3.69 (s, 6H, N-CH<sub>3</sub>). <sup>13</sup>C NMR (101 MHz, CDCl<sub>3</sub>)  $\delta$  146.88, 137.48, 135.84, 132.87, 128.35, 127.50, 121.50, 120.16, 118.71, 118.36, 109.16, 105.46, 56.36, 40.38, 32.83. ESI-MS ( $m/z$ ): 426.1943 [ $M^+$ ] for C<sub>27</sub>H<sub>26</sub>N<sub>2</sub>O<sub>3</sub>.

**5P: 4-(bis(6-fluoro-1H-indol-3-yl)methyl)-N,N-dimethylaniline**

Vine colour powdered solid, M.P.: 152-156 °C, <sup>1</sup>H NMR (400 MHz, CDCl<sub>3</sub>)  $\delta$  7.92 (s, 2H, NH), 7.28 (s, 1H, ArH), 7.25 (s, 1H, ArH), 7.16 (d,  $J = 7.3$  Hz, 2H, ArH), 7.00 (d,  $J = 9.6$  Hz, 2H, ArH), 6.74 – 6.68 (m, 4H, ArH), 6.60 (s, 2H, ArH), 5.70 (s, 1H, CH), 2.91 (s, 6H, N-CH<sub>3</sub>). <sup>13</sup>C NMR (101 MHz, CDCl<sub>3</sub>)  $\delta$  161.11, 158.75, 136.62, 129.26, 123.77, 123.74, 120.75, 120.31, 112.89, 108.10, 107.85, 97.50, 97.25, 41.00, 39.21. ESI-MS ( $m/z$ ): 401.1704 [ $M^+$ ] for C<sub>25</sub>H<sub>21</sub>F<sub>2</sub>N<sub>3</sub>.

**5Q: 3,3'-(1-(3,4-dimethoxyphenyl)ethane-1,1-diyl)bis(1-methyl-1H-indole)**

Creamy yellow solid, M.P.: 134-138 °C, <sup>1</sup>H NMR (400 MHz, CDCl<sub>3</sub>)  $\delta$  7.34 (dd,  $J = 8.0, 0.8$  Hz, 2H, ArH), 7.29 (d,  $J = 8.2$  Hz, 2H, ArH), 7.17 (ddd,  $J = 8.2, 7.0, 1.0$  Hz, 2H, ArH), 7.01 (d,  $J = 2.2$  Hz, 1H, ArH), 6.96 – 6.89 (m, 3H, ArH), 6.75 (d,  $J = 8.5$  Hz, 1H, ArH), 6.49 (s, 2H,

ArH), 3.86 (s, 3H, OCH<sub>3</sub>), 3.67 (d,  $J = 2.6$  Hz, 3H, OCH<sub>3</sub>; 6H, N-CH<sub>3</sub>), 2.34 (s, 3H, CH<sub>3</sub>). <sup>13</sup>C NMR (101 MHz, CDCl<sub>3</sub>)  $\delta$  148.12, 146.95, 141.30, 137.85, 128.15, 126.88, 123.56, 122.32, 121.12, 120.41, 118.44, 111.98, 110.36, 109.24, 55.85, 43.46, 32.75, 29.39. ESI-MS ( $m/z$ ): 424.2151 [ $M^+$ ], Found: 424.2140 for C<sub>28</sub>H<sub>28</sub>N<sub>2</sub>O<sub>2</sub>.

**5R: 3,3'-(1-(p-tolyl)ethane-1,1-diyl)bis(1-methyl-1H-indole)**

Beige coloured powder, M.P.: 170-174 °C<sup>7</sup>, <sup>1</sup>H NMR (400 MHz, CDCl<sub>3</sub>)  $\delta$  7.33 (d,  $J = 8.0$  Hz, 2H, ArH), 7.29 (dd,  $J = 8.3, 2.2$  Hz, 4H, ArH), 7.17 (ddd,  $J = 8.2, 7.0, 1.0$  Hz, 2H, ArH), 7.06 (d,  $J = 8.0$  Hz, 2H, ArH), 6.94 (ddd,  $J = 8.0, 7.0, 1.0$  Hz, 2H, ArH), 6.50 (s, 2H, ArH), 3.67 (s, 6H, N-CH<sub>3</sub>), 2.34 (d,  $J = 5.7$  Hz, 6H, CH<sub>3</sub>). <sup>13</sup>C NMR (101 MHz, CDCl<sub>3</sub>)  $\delta$  145.46, 137.85, 135.10, 128.57, 127.09, 126.94, 123.55, 122.33, 121.07, 118.39, 109.22, 43.41, 32.73, 29.28, 21.11. ESI-MS ( $m/z$ ): 378.2096 [ $M^+$ ] for C<sub>27</sub>H<sub>26</sub>N<sub>2</sub>.

**5S: 3,3'-(cyclopentane-1,1-diyl)bis(1-methyl-1H-indole)**

Dark pink powder, M.P.: 114-118 °C, <sup>1</sup>H NMR (400 MHz, CDCl<sub>3</sub>)  $\delta$  7.54 (d,  $J = 8.0$  Hz, 2H, ArH), 7.25 (s, 1H, ArH), 7.23 (s, 1H, ArH), 7.15 – 7.11 (m, 2H, ArH), 6.95 – 6.91 (m, 4H, ArH), 3.73 (s, 6H, N-CH<sub>3</sub>), 2.52 (s, 4H, CH<sub>2</sub>), 1.84 (s, 4H, CH<sub>2</sub>). <sup>13</sup>C NMR (101 MHz, CDCl<sub>3</sub>)  $\delta$  137.93, 126.95, 126.14, 122.11, 121.43, 120.97, 118.06, 109.16, 46.18, 39.05, 32.79, 24.18. ESI-MS ( $m/z$ ): 328.1939 [ $M^+$ ], Found: 327.5009 for C<sub>23</sub>H<sub>24</sub>N<sub>2</sub>.

**5T: 3,3'-(cyclohexane-1,1-diyl)bis(1-methyl-1H-indole)**

Moss coloured solid, M.P.: 166-170 °C<sup>8</sup>, <sup>1</sup>H NMR (400 MHz, CDCl<sub>3</sub>)  $\delta$  7.63 (d,  $J = 8.4$  Hz, 3H, ArH), 7.26 (d,  $J = 11.3$  Hz, 2H, ArH), 7.14 (t,  $J = 8.3$  Hz, 1H, ArH), 6.97 – 6.92 (m, 4H, ArH), 3.74 (s, 6H, N-CH<sub>3</sub>), 2.59 – 2.56 (m, 4H, CH<sub>2</sub>), 1.72 – 1.59 (m, 6H, CH<sub>2</sub>). <sup>13</sup>C NMR (101 MHz, CDCl<sub>3</sub>)  $\delta$  137.78, 127.15, 126.80, 122.33, 121.76, 120.83, 118.04, 109.23, 39.77, 37.20, 32.83, 26.91, 23.17. ESI-MS ( $m/z$ ): 342.2096 [ $M^+$ ] for C<sub>24</sub>H<sub>26</sub>N<sub>2</sub>.

**5U: 3,3-dimethyl-5,5-bis(1-methyl-1H-indol-3-yl)cyclohexan-1-one**

Dark purple powdered solid, M.P.: 98-102 °C, <sup>1</sup>H NMR (400 MHz, CDCl<sub>3</sub>)  $\delta$  8.00 (d,  $J = 7.4$  Hz, 2H, ArH), 7.34 (dd,  $J = 25.0, 18.5$  Hz, 6H, ArH), 6.67 (s, 2H, ArH), 3.81 (s, 6H, N-CH<sub>3</sub>), 2.66 (s, 3H, CH<sub>2</sub>), 2.34 (s, 3H, CH<sub>2</sub>), 1.13 (s, 6H, CH<sub>3</sub>). <sup>13</sup>C NMR (101 MHz, CDCl<sub>3</sub>)  $\delta$  200.09, 153.05, 138.21, 130.83, 125.59, 123.04, 121.50, 120.36, 115.05, 110.12, 51.04, 42.72, 33.48, 33.40, 33.25, 28.64. ESI-MS ( $m/z$ ): 384.2202 [ $M^+$ ], Found: 385.2278 for C<sub>26</sub>H<sub>28</sub>N<sub>2</sub>O.

SA-SS-B12

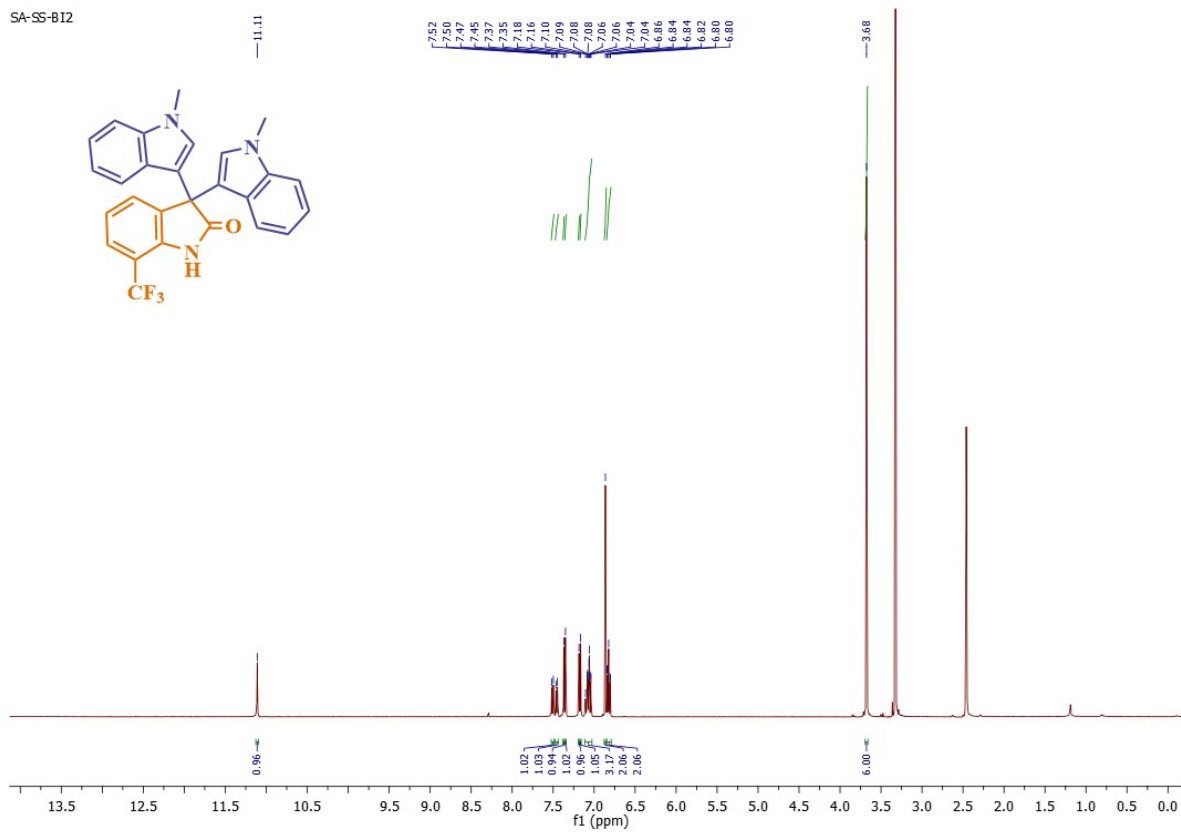Figure S1: <sup>1</sup>H NMR spectrum of compound 5A.

SA-SS-B12

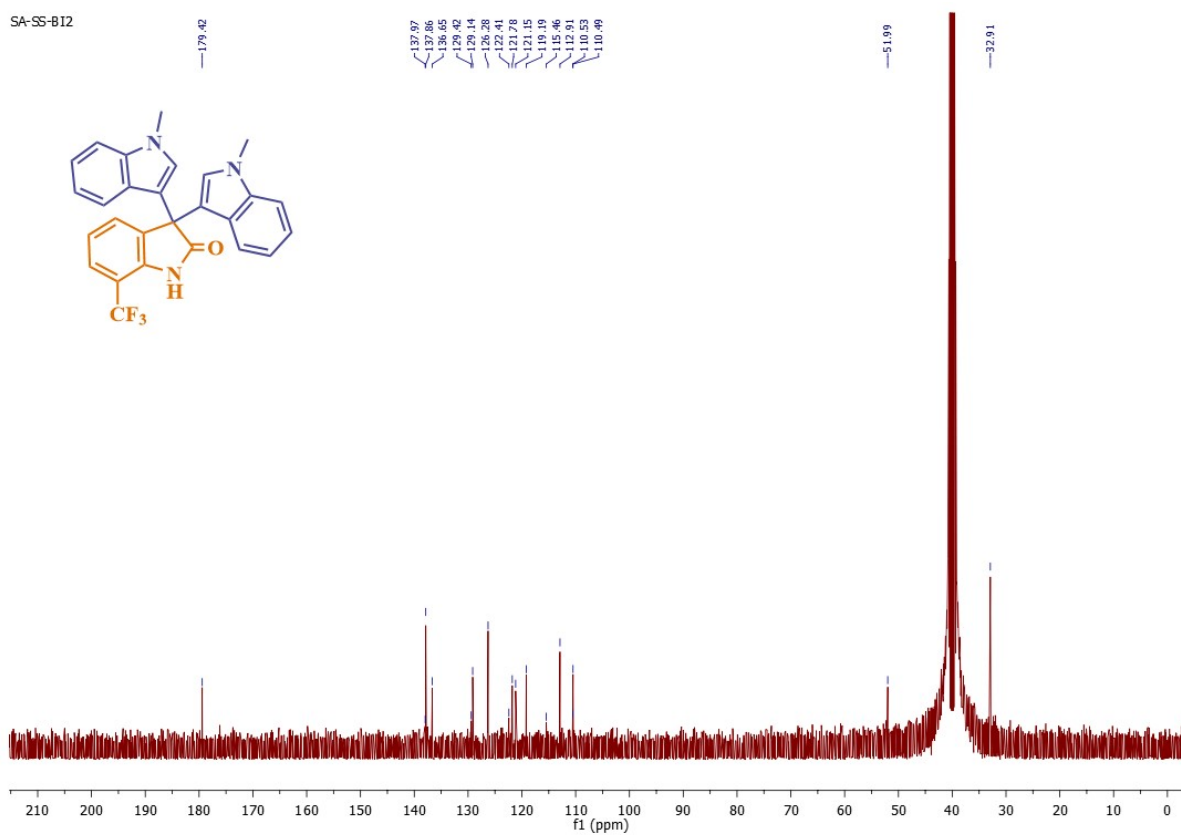Figure S2: <sup>13</sup>C NMR spectrum of compound 5A.

SA-SS-B13

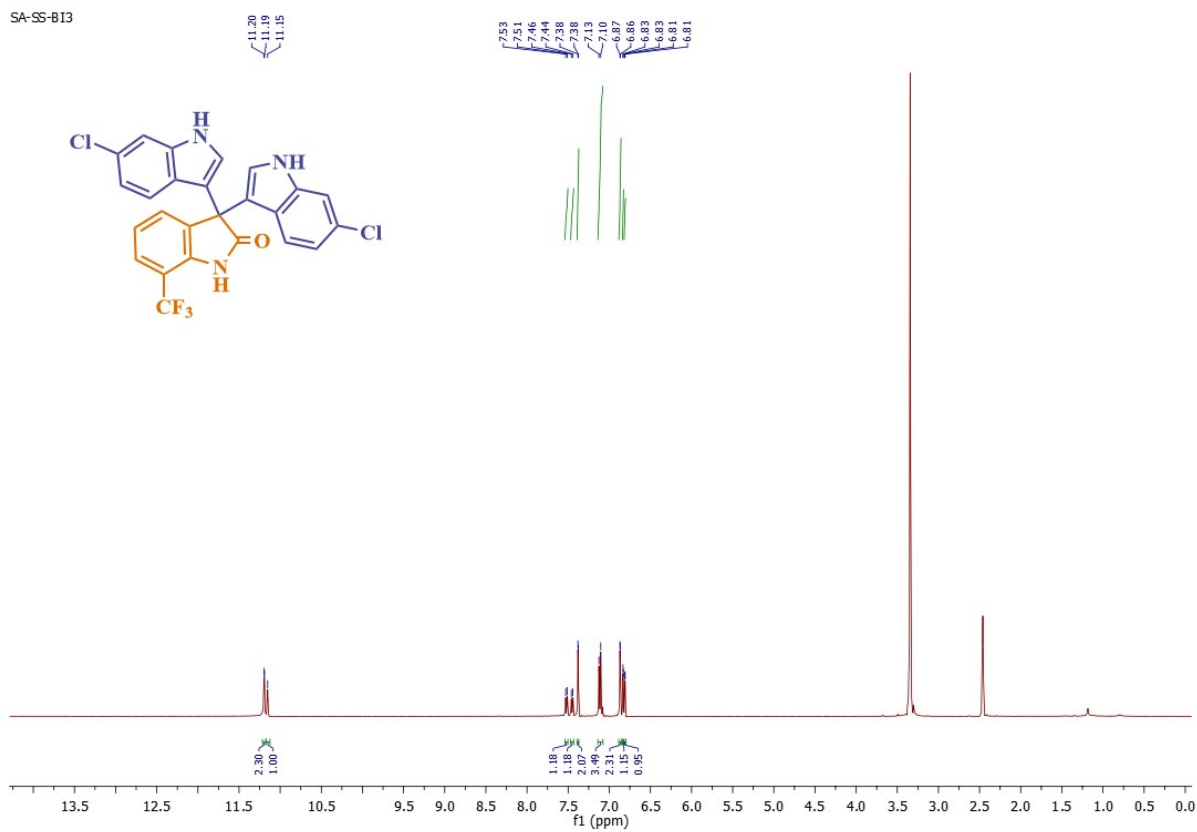Figure S3: <sup>1</sup>H NMR spectrum of compound 5B.

SA-SS-B13

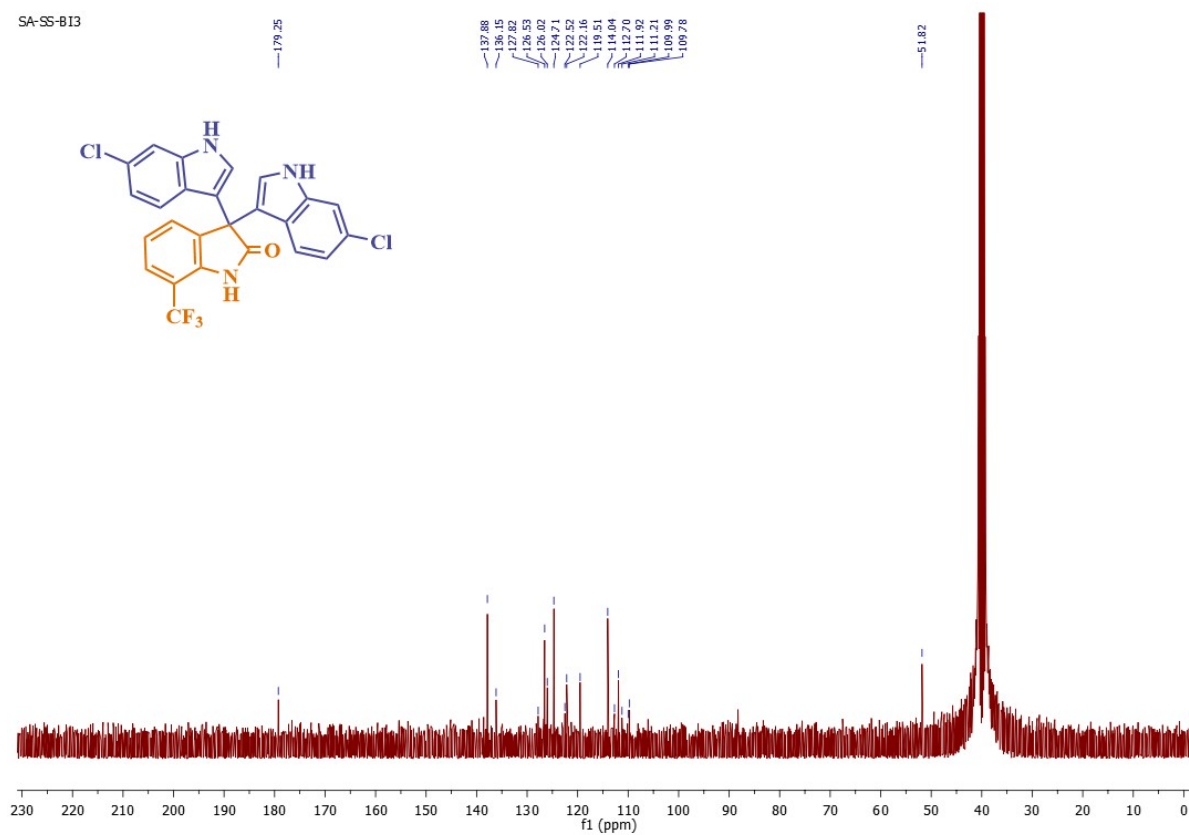Figure S4: <sup>13</sup>C NMR spectrum of compound 5B.

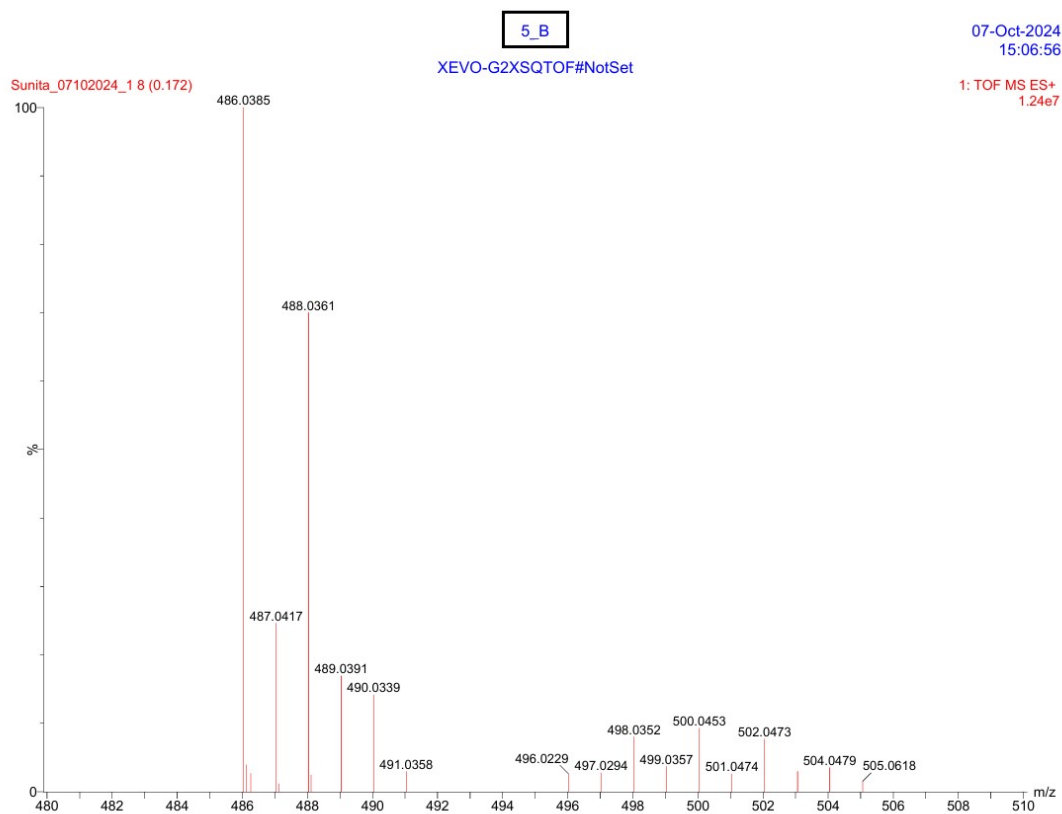

**Figure S5:** The HRMS profile of compound 5B.

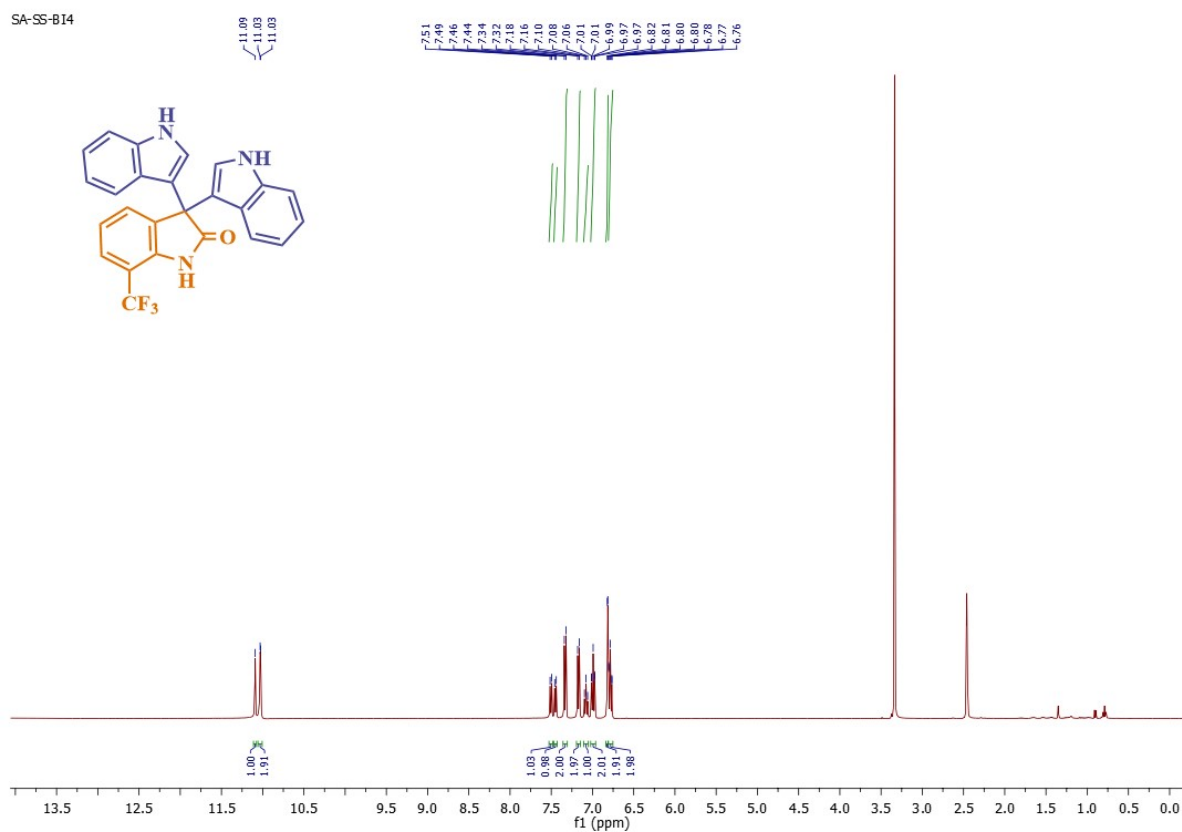

**Figure S6:**  $^1\text{H}$  NMR spectrum of compound 5C.

SA-SS-B14

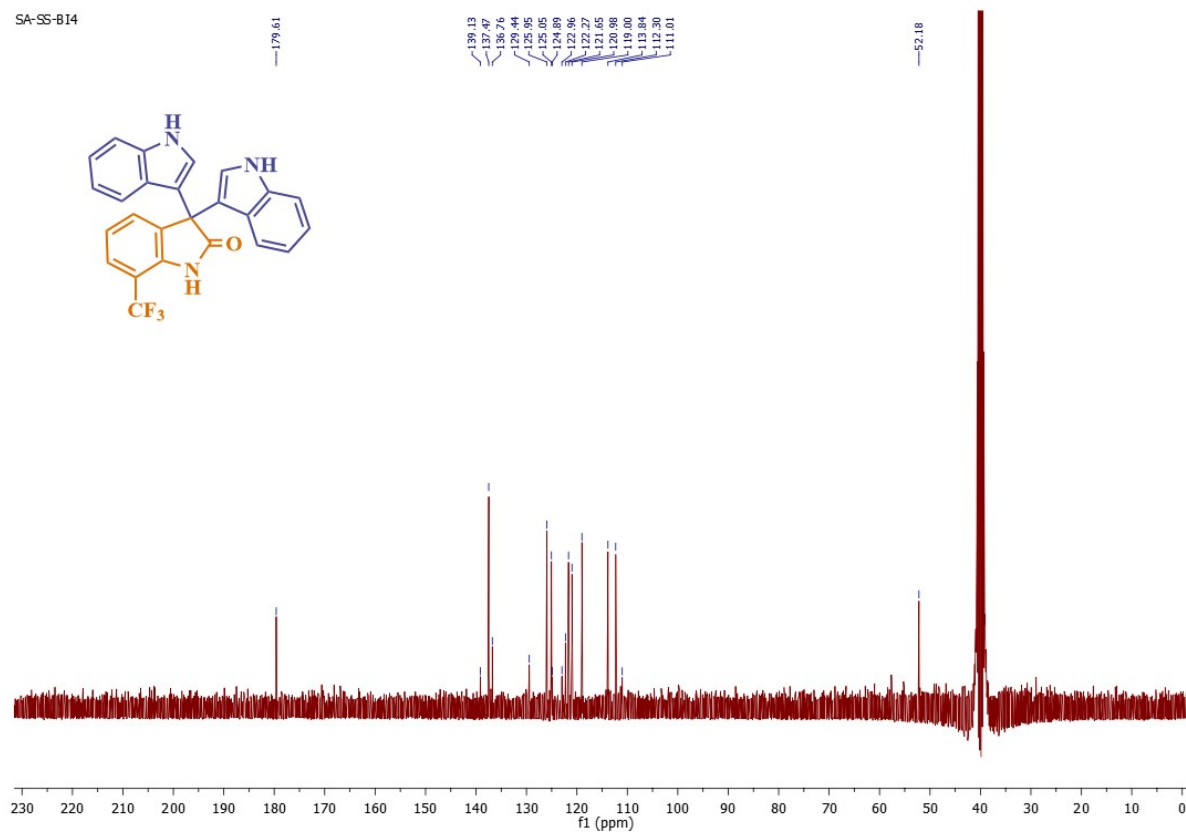Figure S7: <sup>13</sup>C NMR spectrum of compound 5C.

SA-SS-B17

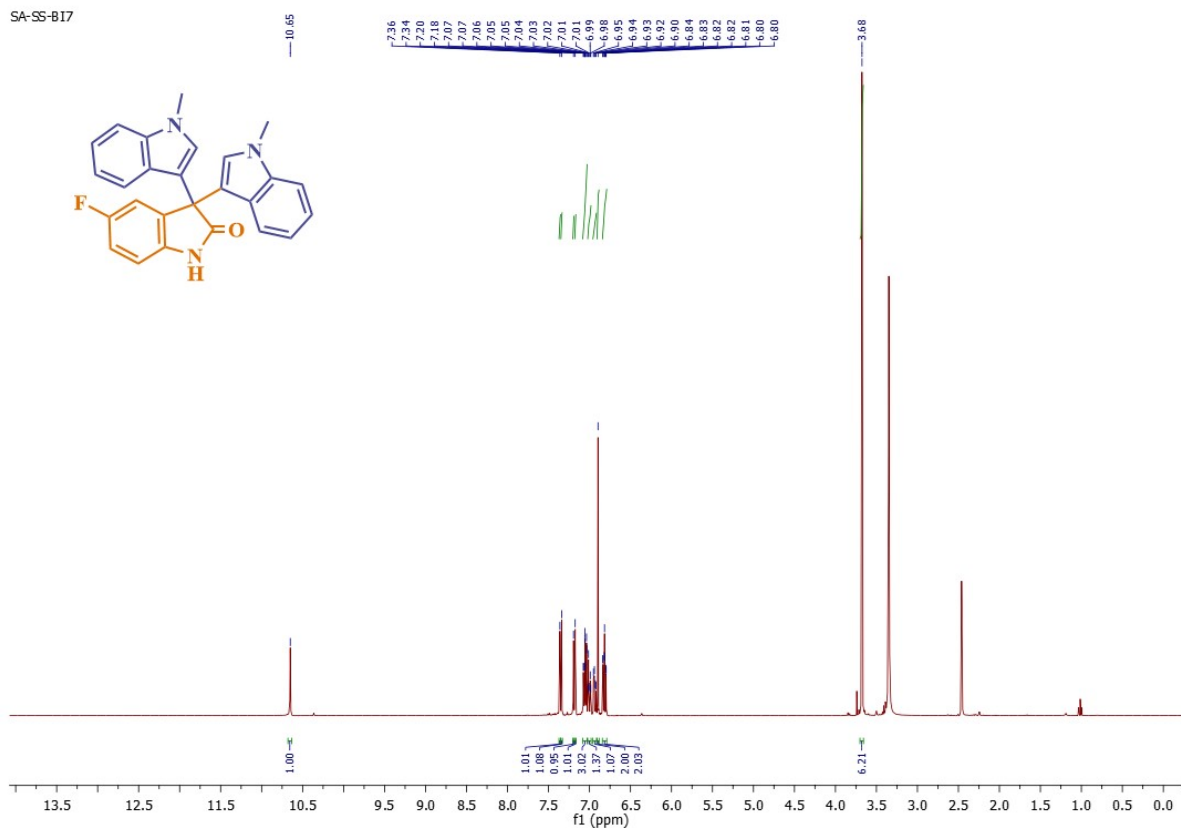Figure S8: <sup>1</sup>H NMR spectrum of compound 5D.

SA-SS-B17

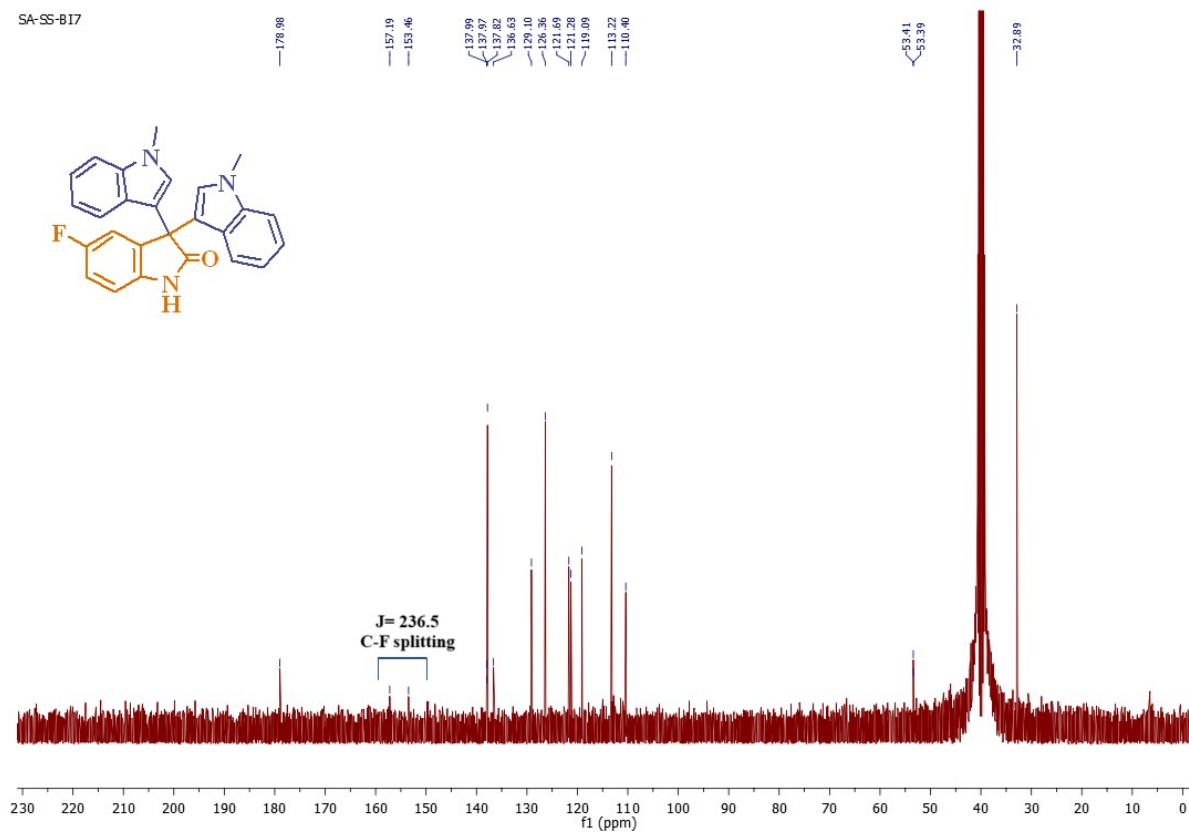Figure S9:  $^{13}\text{C}$  NMR spectrum of compound 5D.

SA-SS-B18

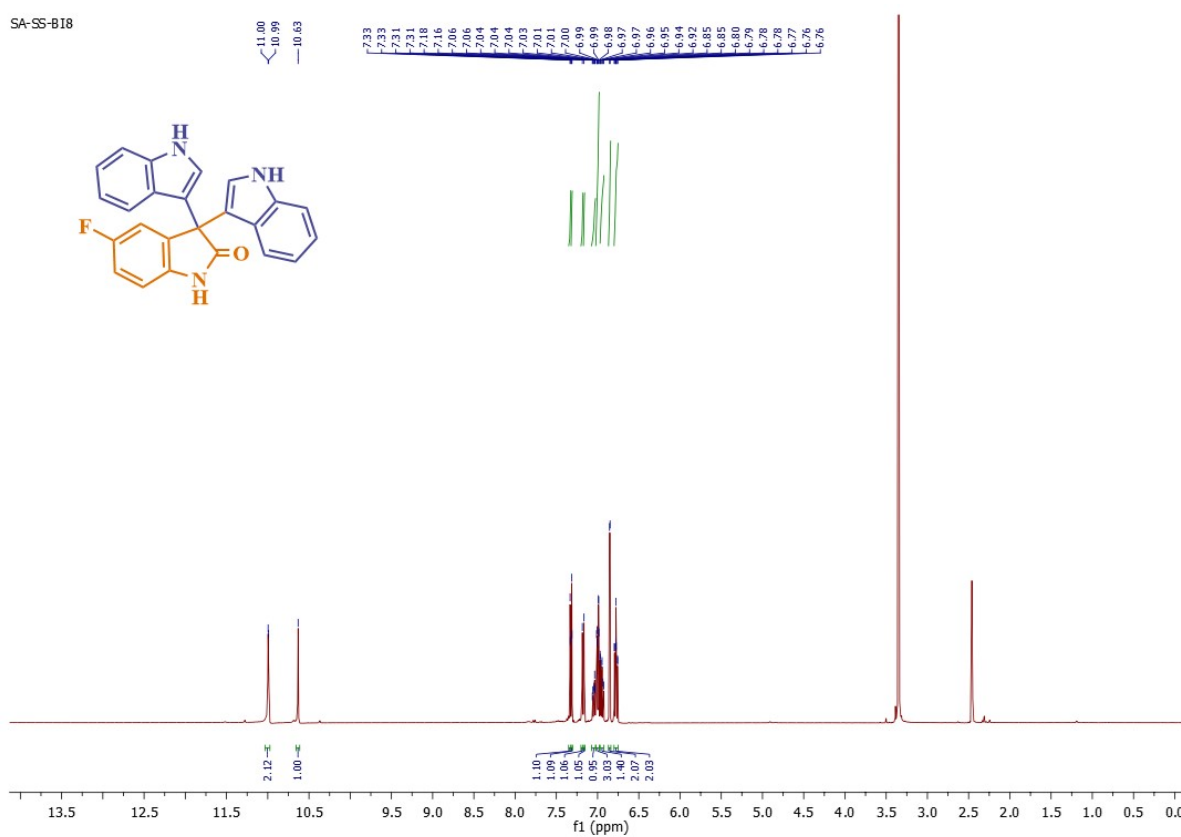Figure S10:  $^1\text{H}$  NMR spectrum of compound 5E.

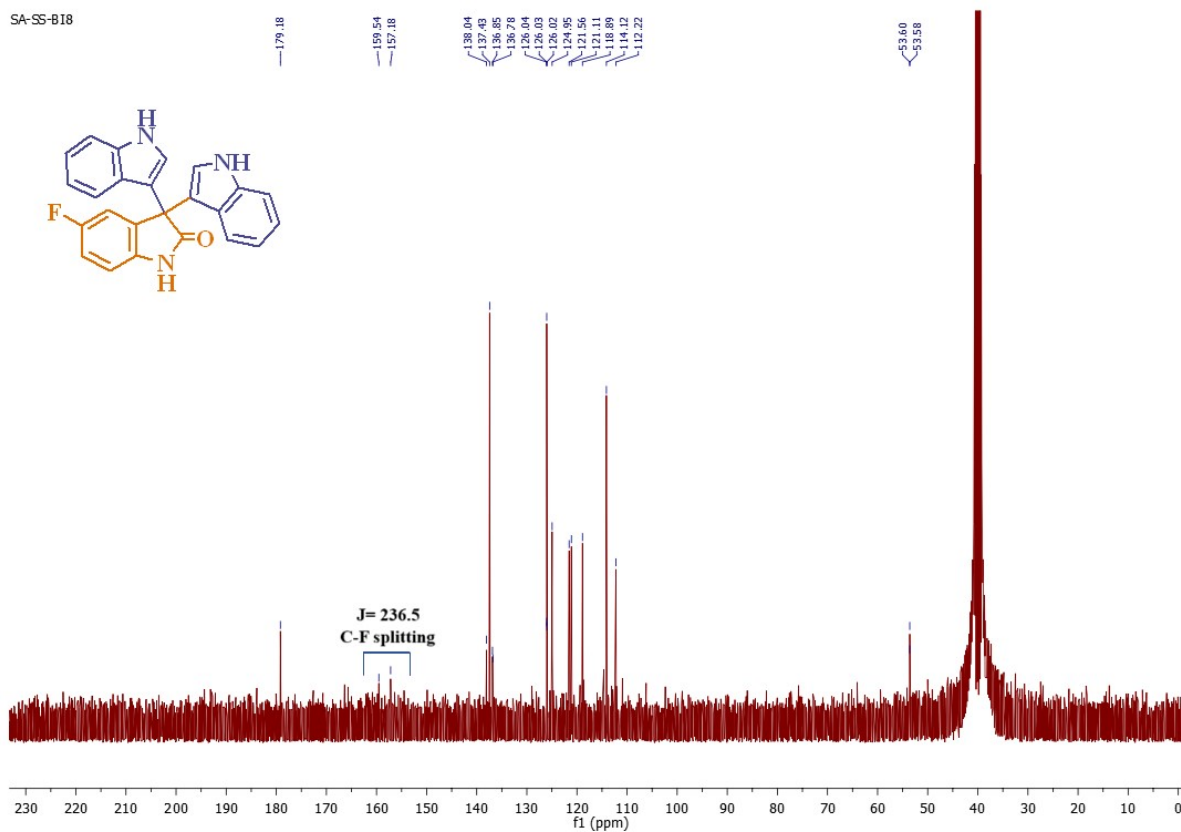

Figure S11:  $^{13}\text{C}$  NMR spectrum of compound 5E.

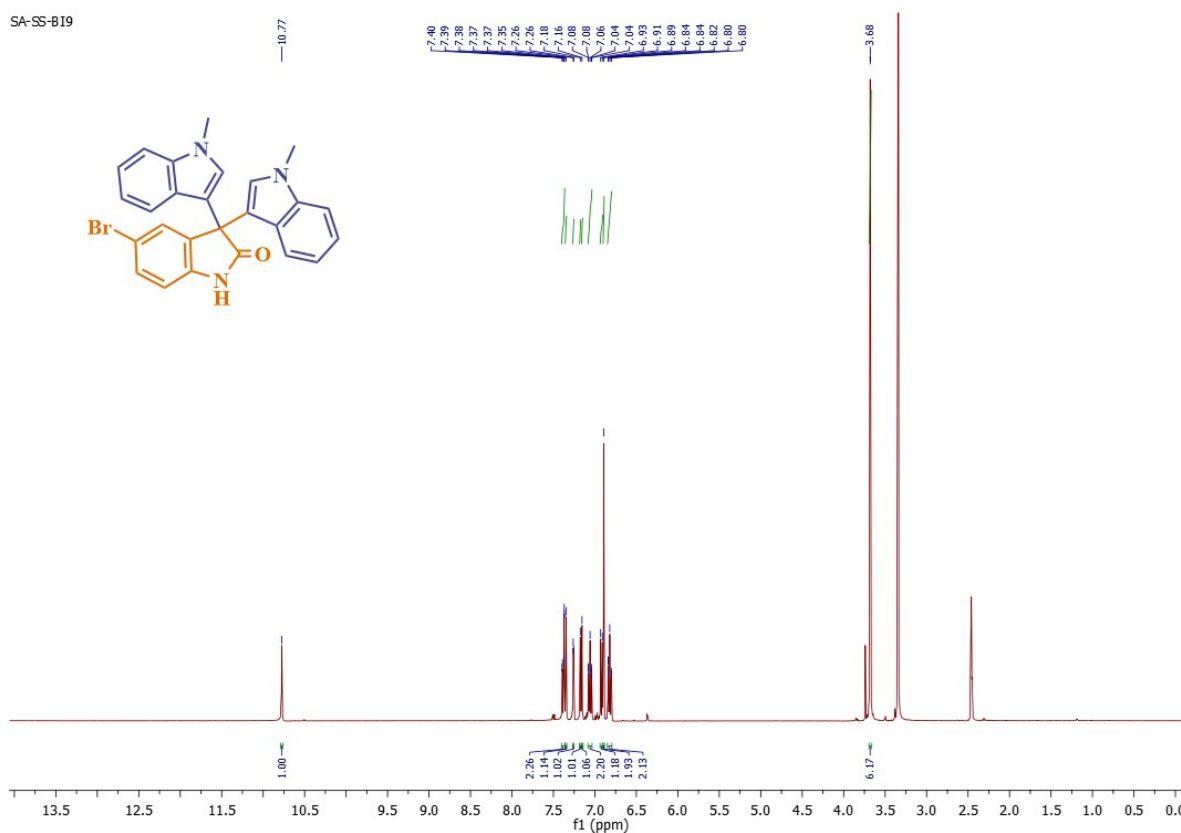

Figure S12:  $^1\text{H}$  NMR spectrum of compound 5F.



SA-SS-B19

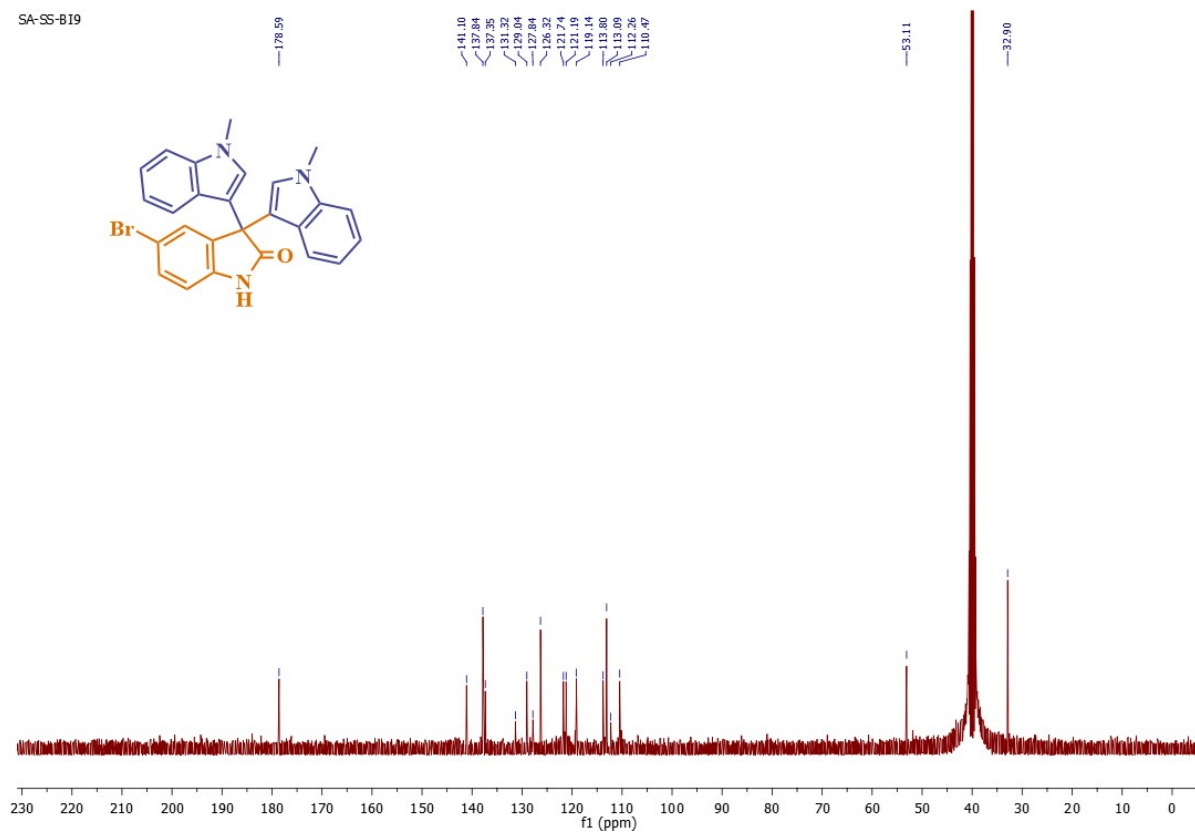Figure S13: <sup>13</sup>C NMR spectrum of compound 5F.

SA-SS-B110

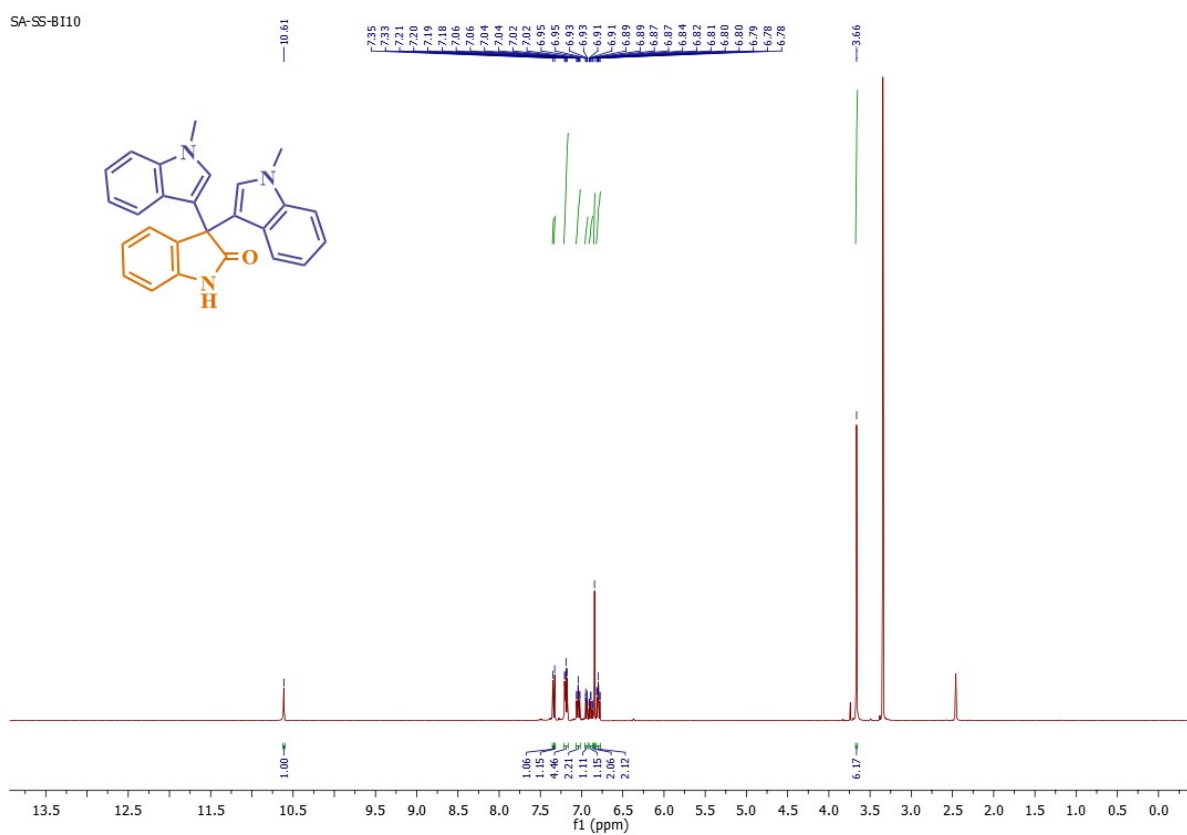Figure S14: <sup>1</sup>H NMR spectrum of compound 5G.

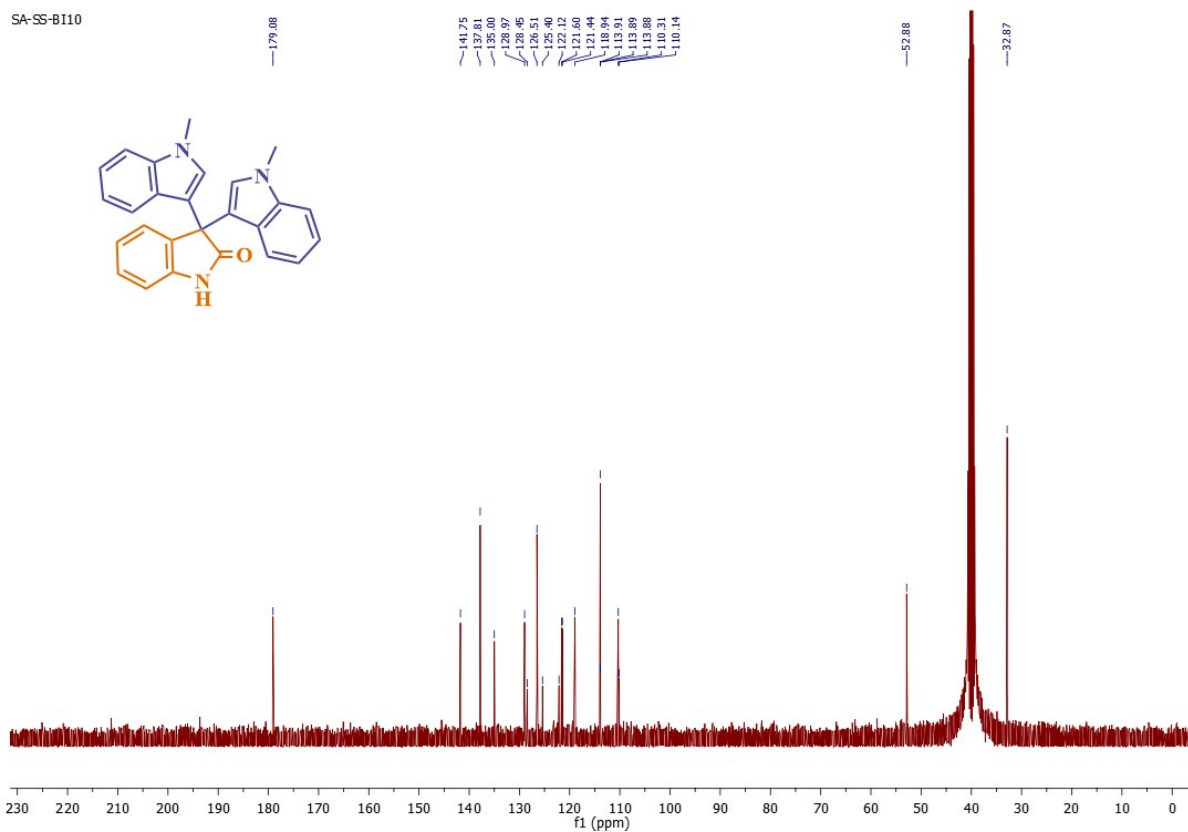

Figure S15:  $^{13}\text{C}$  NMR spectrum of compound 5G.

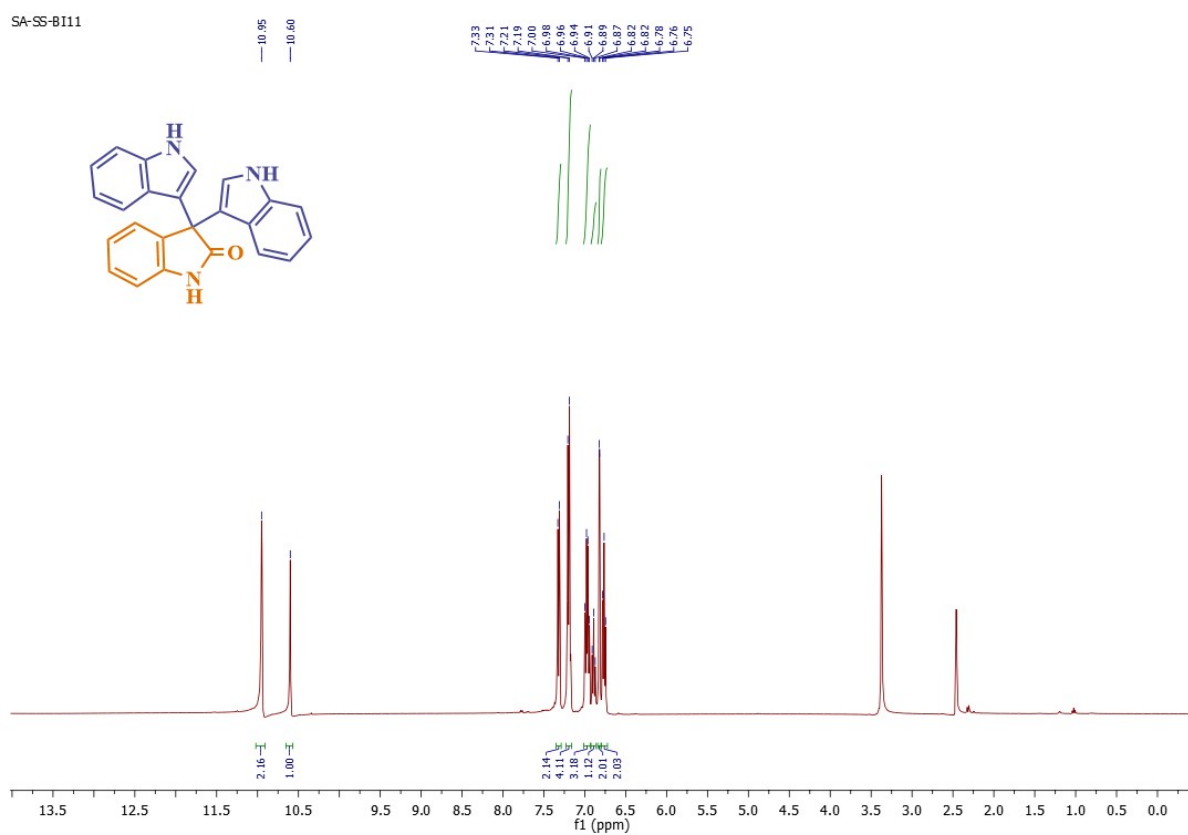

Figure S16:  $^1\text{H}$  NMR spectrum of compound 5H.

SA-SS-BI11

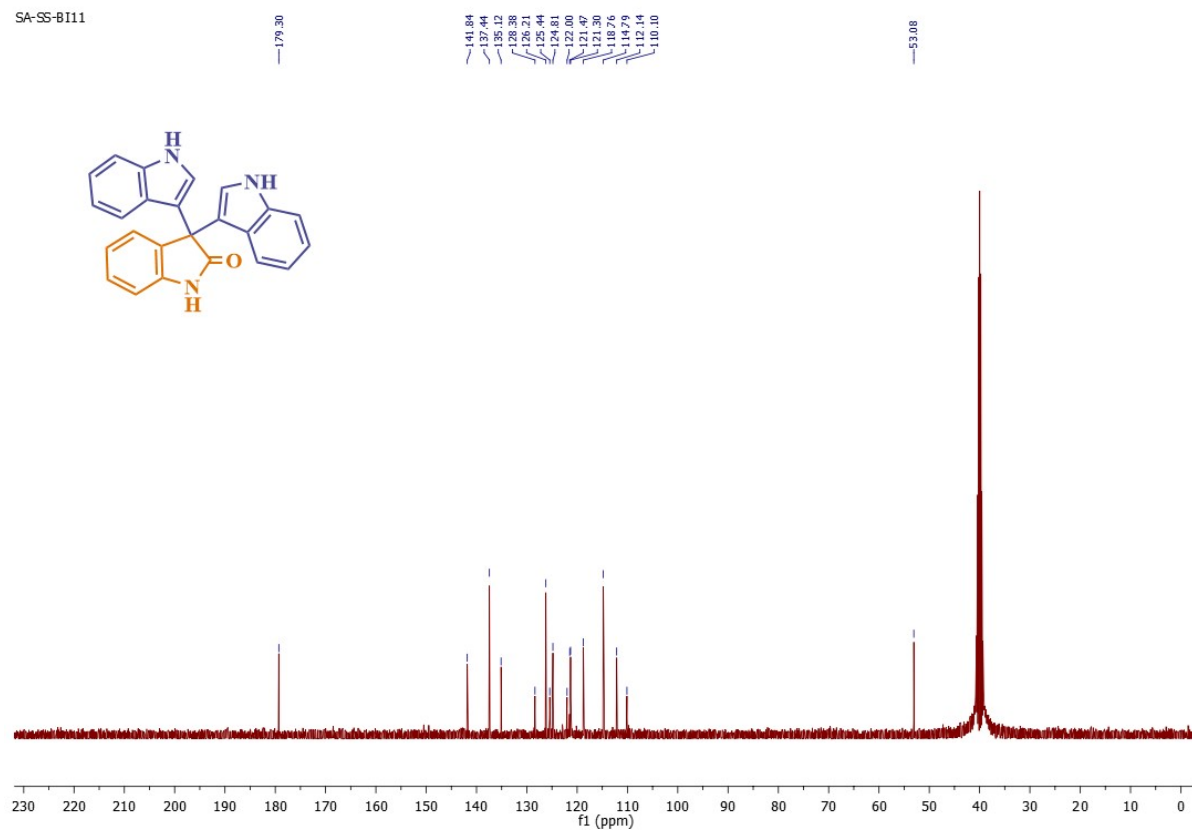Figure S17: <sup>13</sup>C NMR spectrum of compound 5H.

SA-SS-BI12

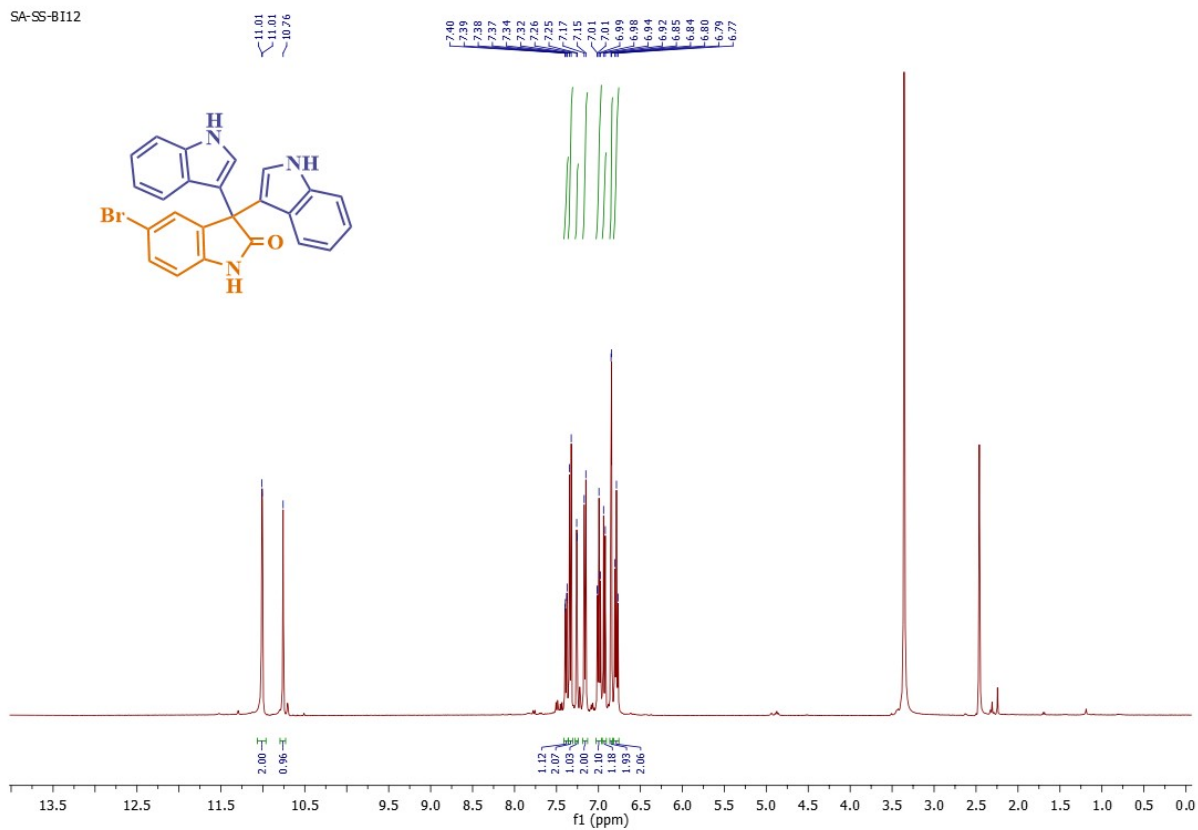Figure S18: <sup>1</sup>H NMR spectrum of compound 5I.

SA-SS-BI12

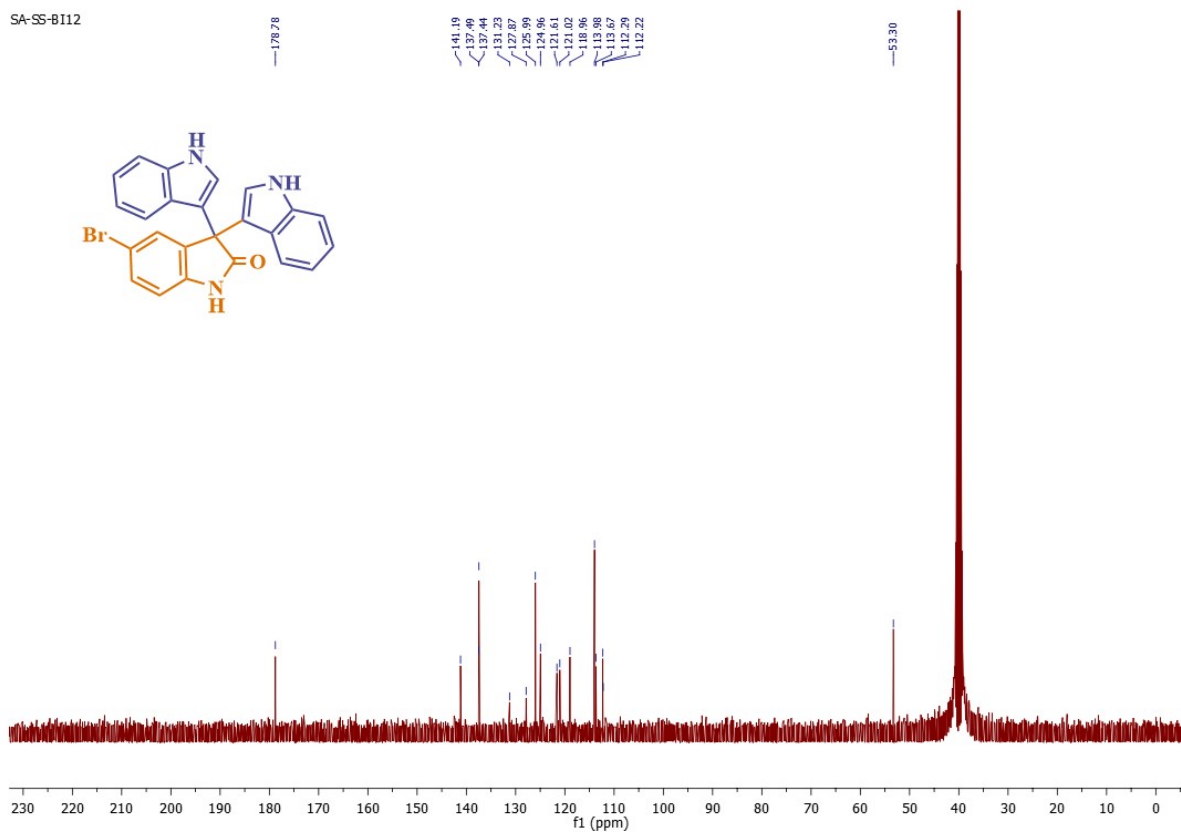Figure S19: <sup>13</sup>C NMR spectrum of compound 5I.

SA-SS-BI16

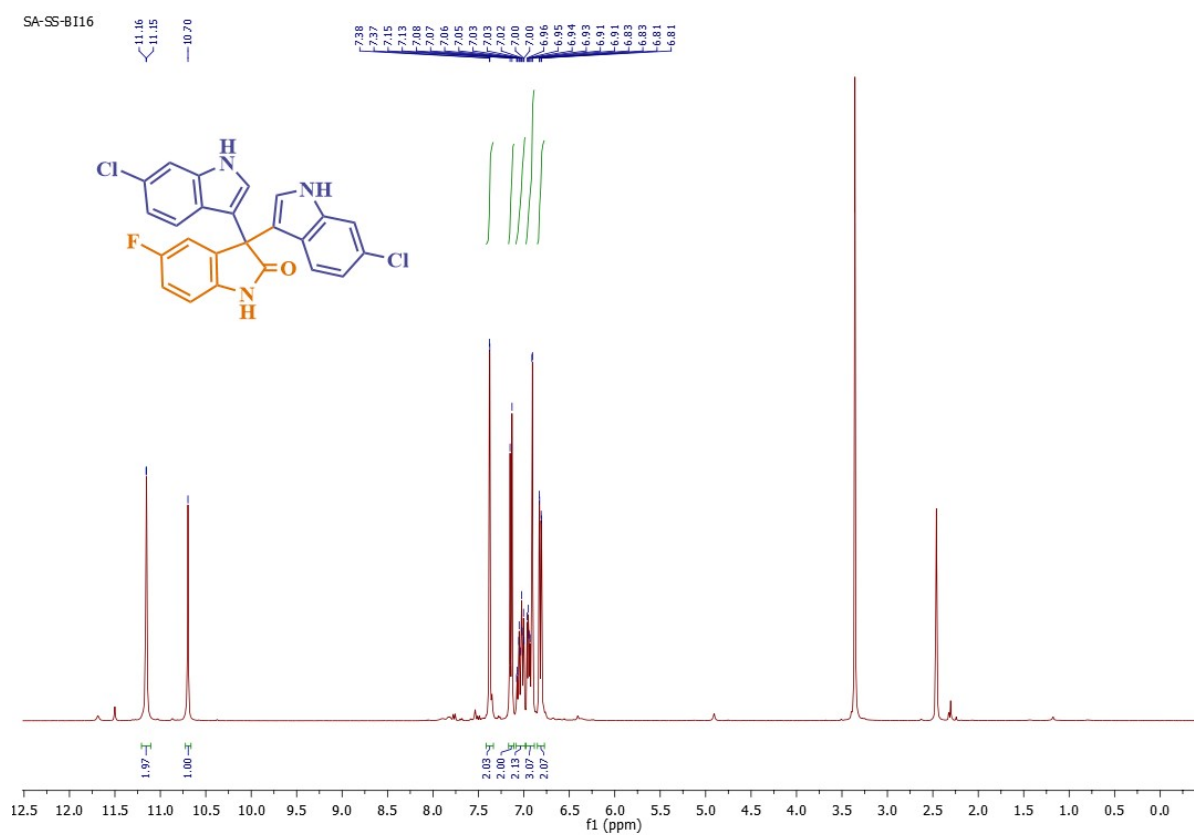Figure S20: <sup>1</sup>H NMR spectrum of compound 5J.

SA-SS-B116

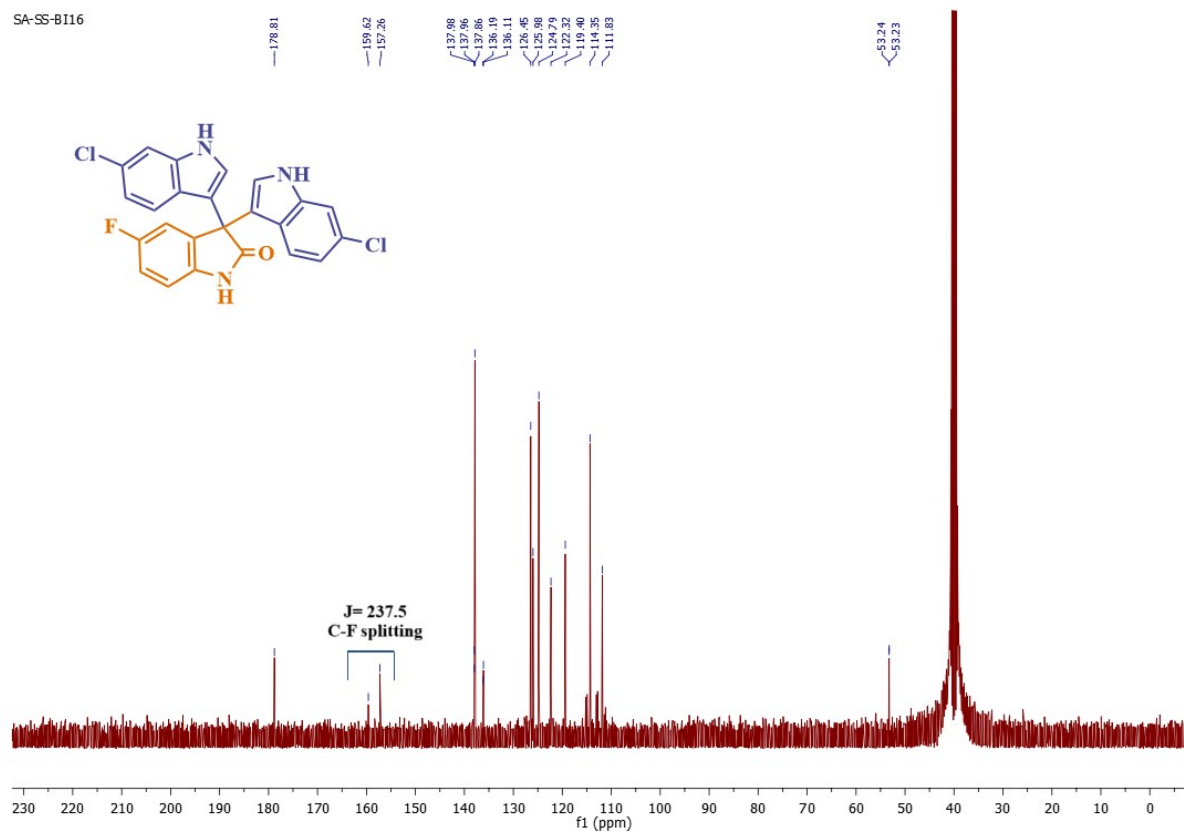Figure S21:  $^{13}\text{C}$  NMR spectrum of compound 5J.

SA-SS-B117

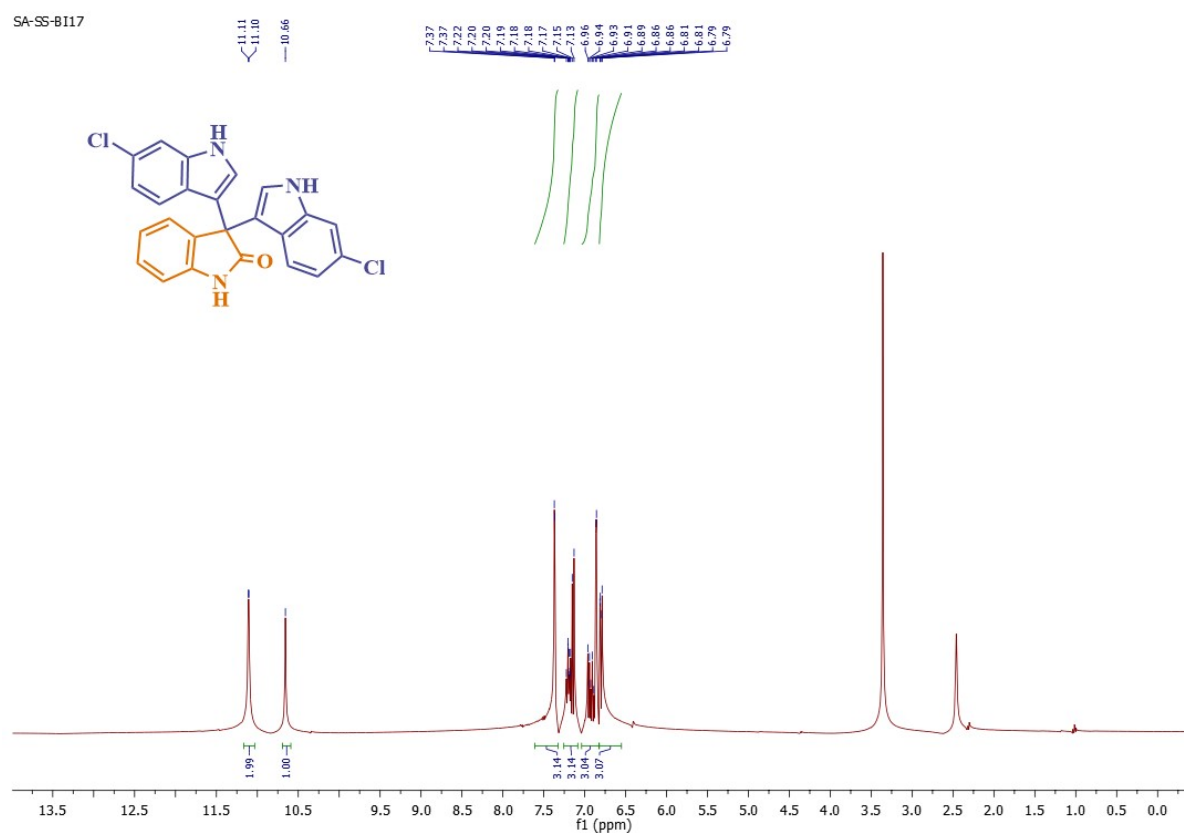Figure S22:  $^1\text{H}$  NMR spectrum of compound 5K.

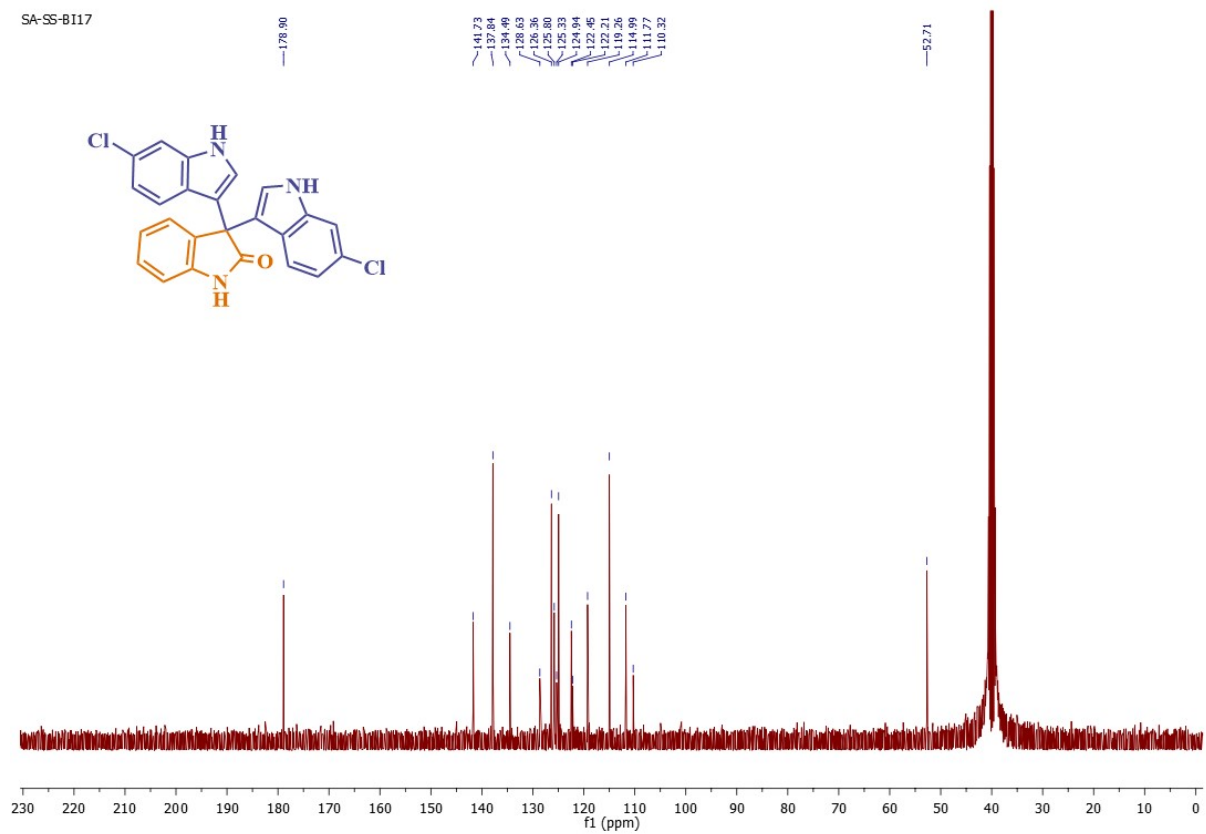

Figure S23:  $^{13}\text{C}$  NMR spectrum of compound 5K.

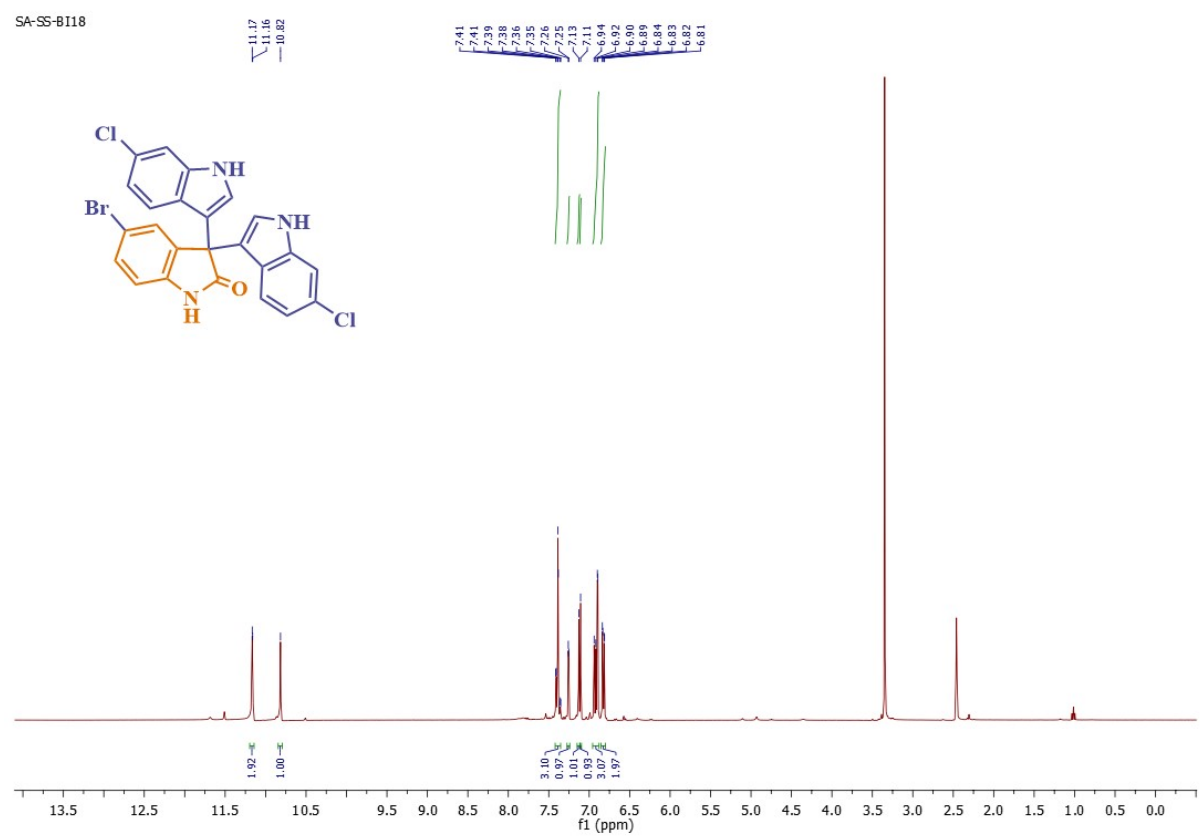

Figure S24:  $^1\text{H}$  NMR spectrum of compound 5L.

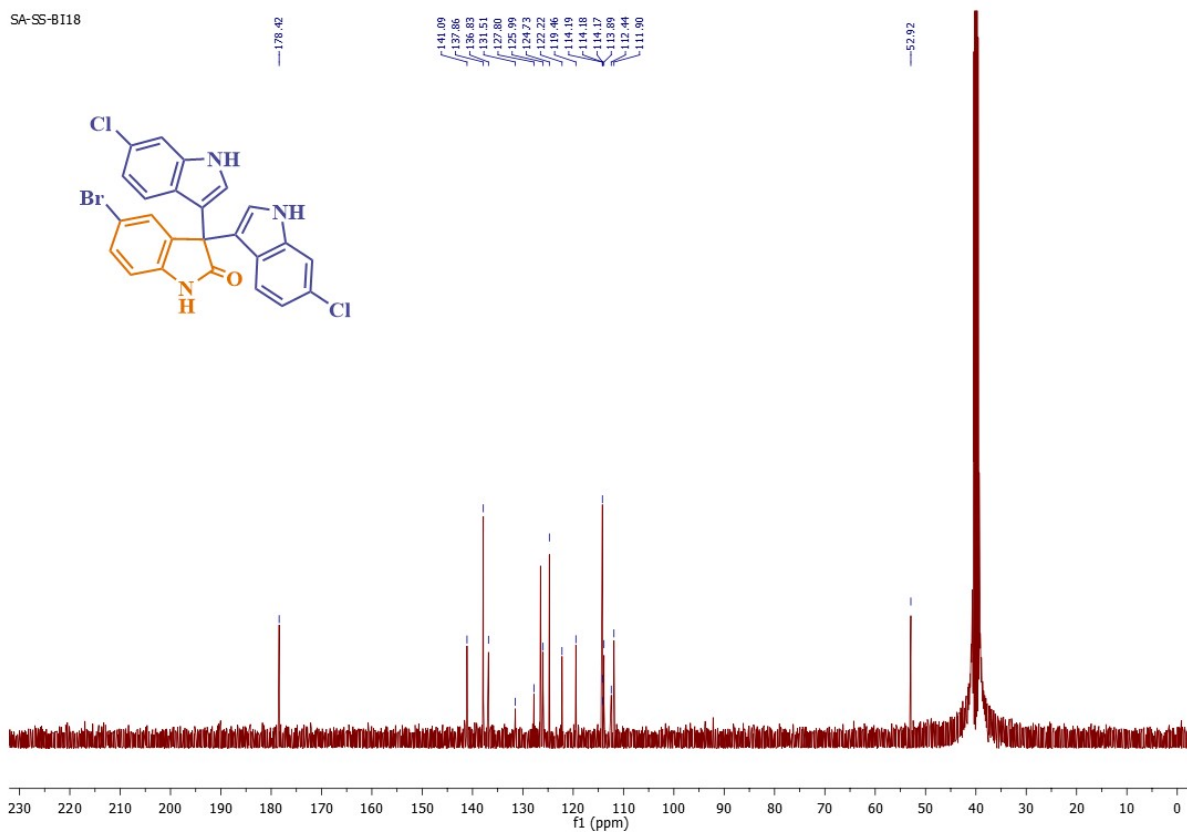

Figure S25:  $^{13}\text{C}$  NMR spectrum of compound 5L.

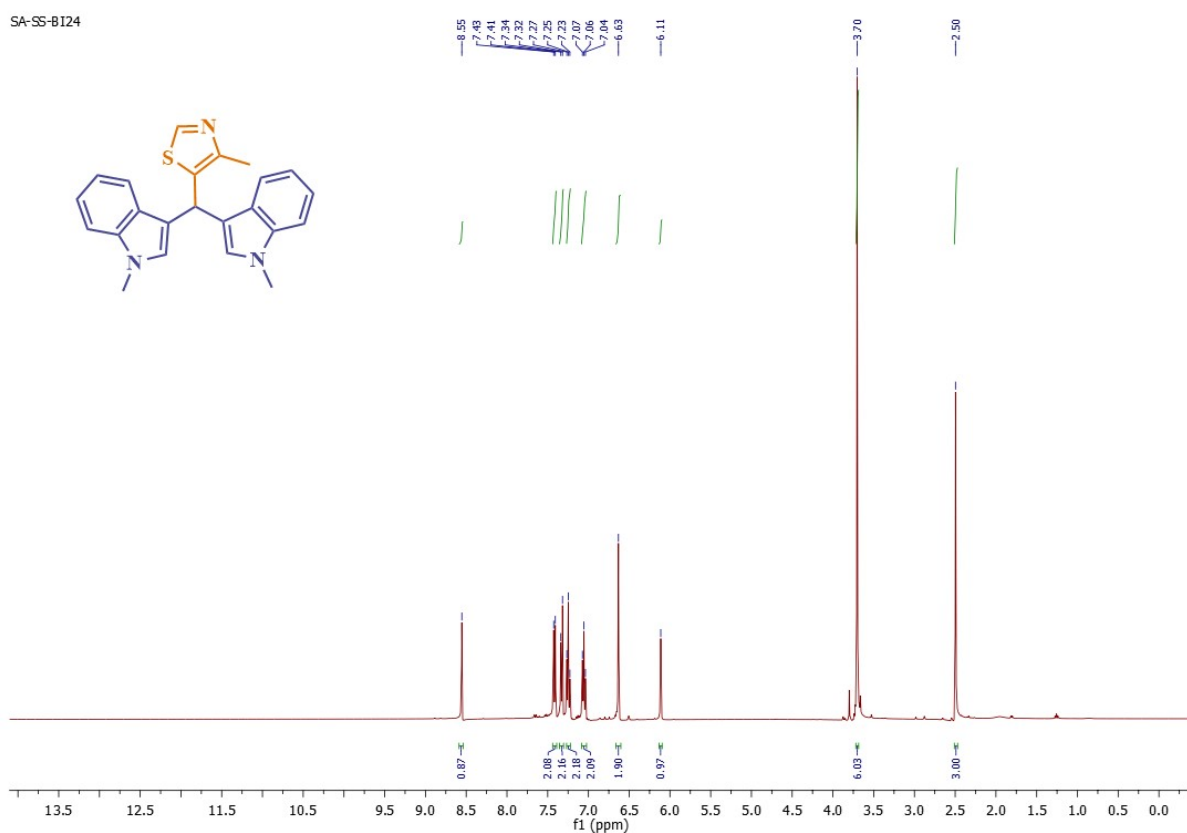

Figure S26:  $^1\text{H}$  NMR spectrum of compound 5M.

SA-SS-BI24

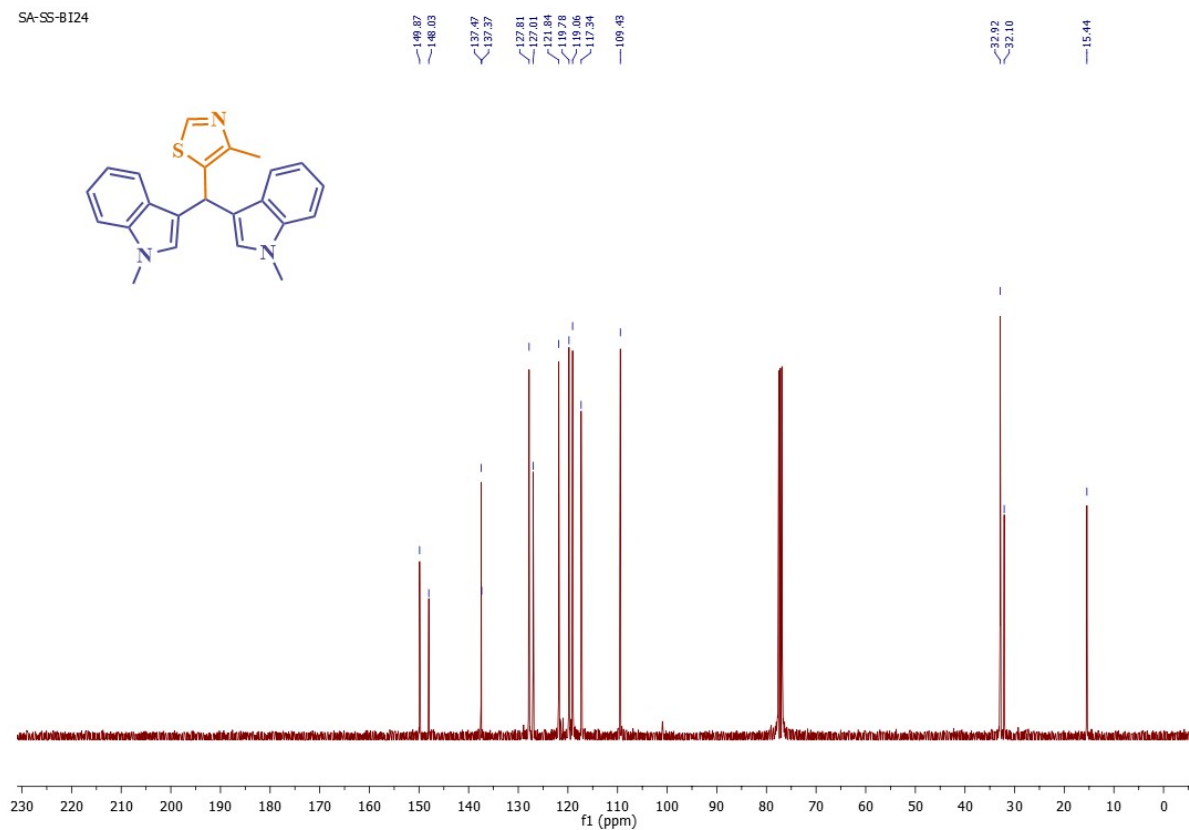

Figure S27: <sup>13</sup>C NMR spectrum of compound 5M.

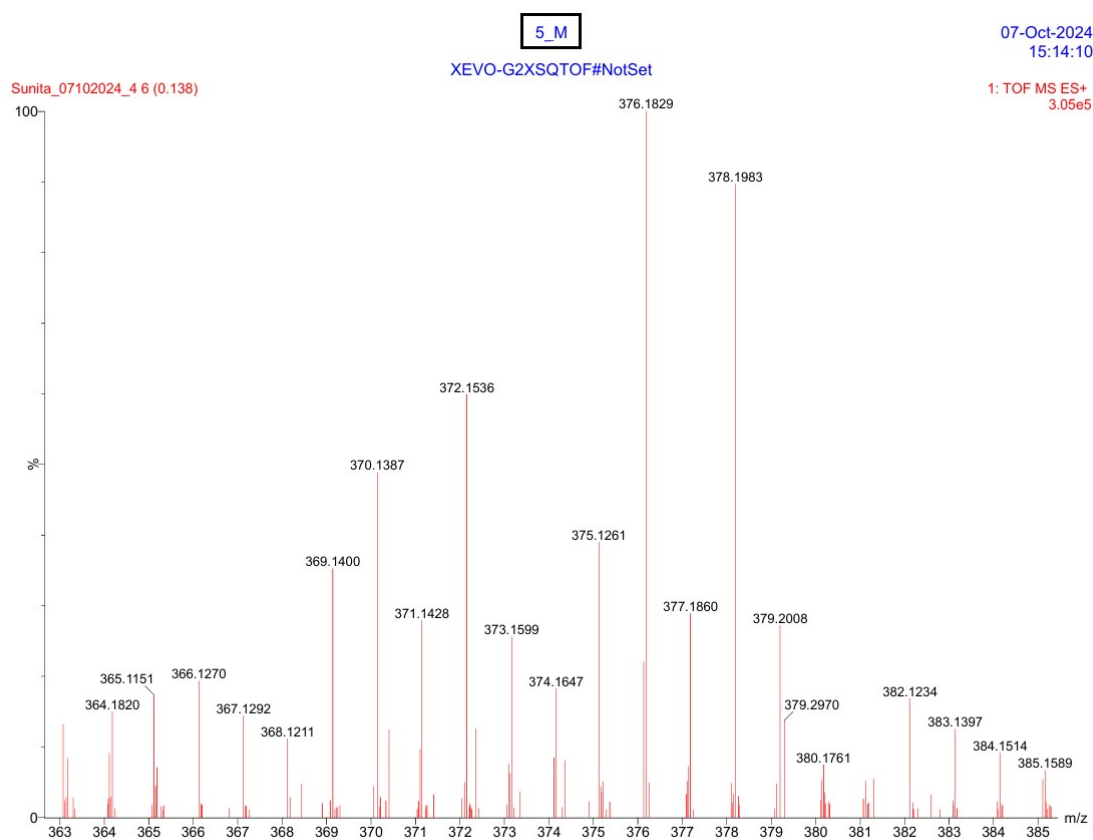

Figure S28: The HRMS profile of compound 5M.



SA-SS-BI23

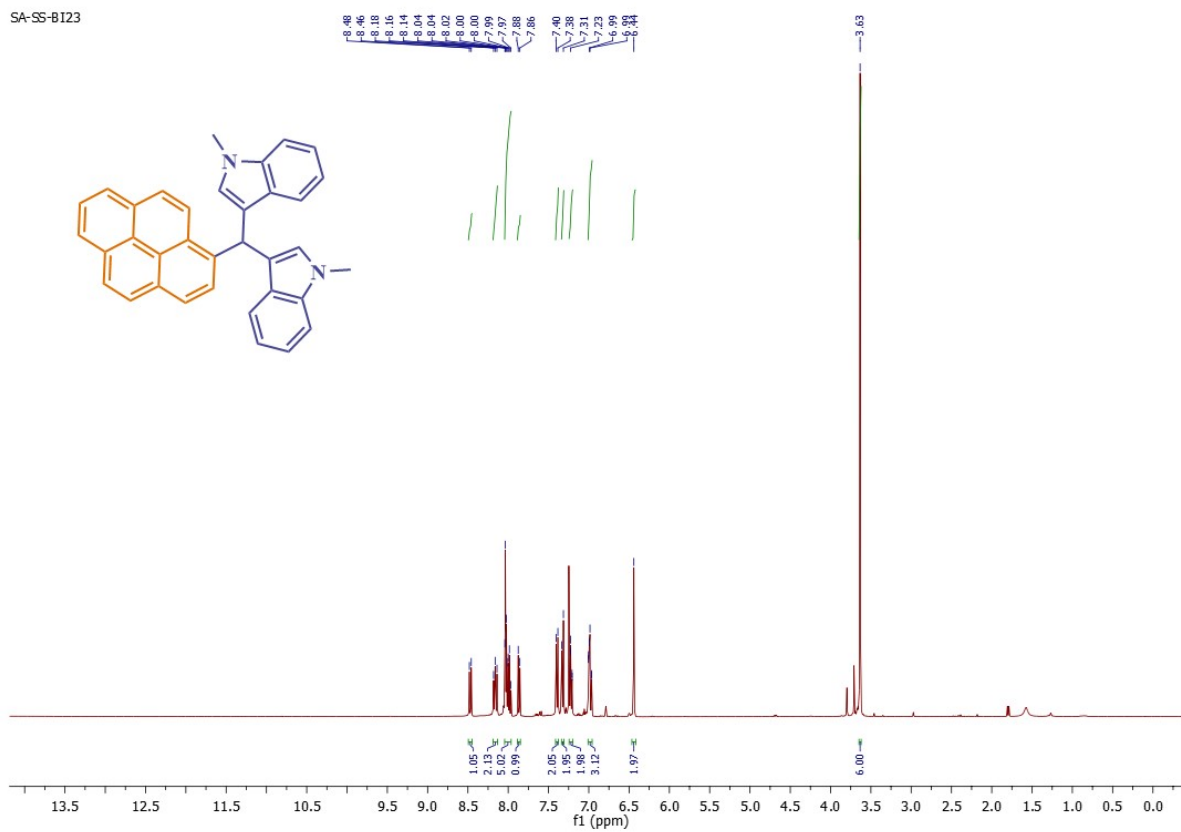

**Figure S29:** <sup>1</sup>H NMR spectrum of compound 5N.

SA-SS-BI23

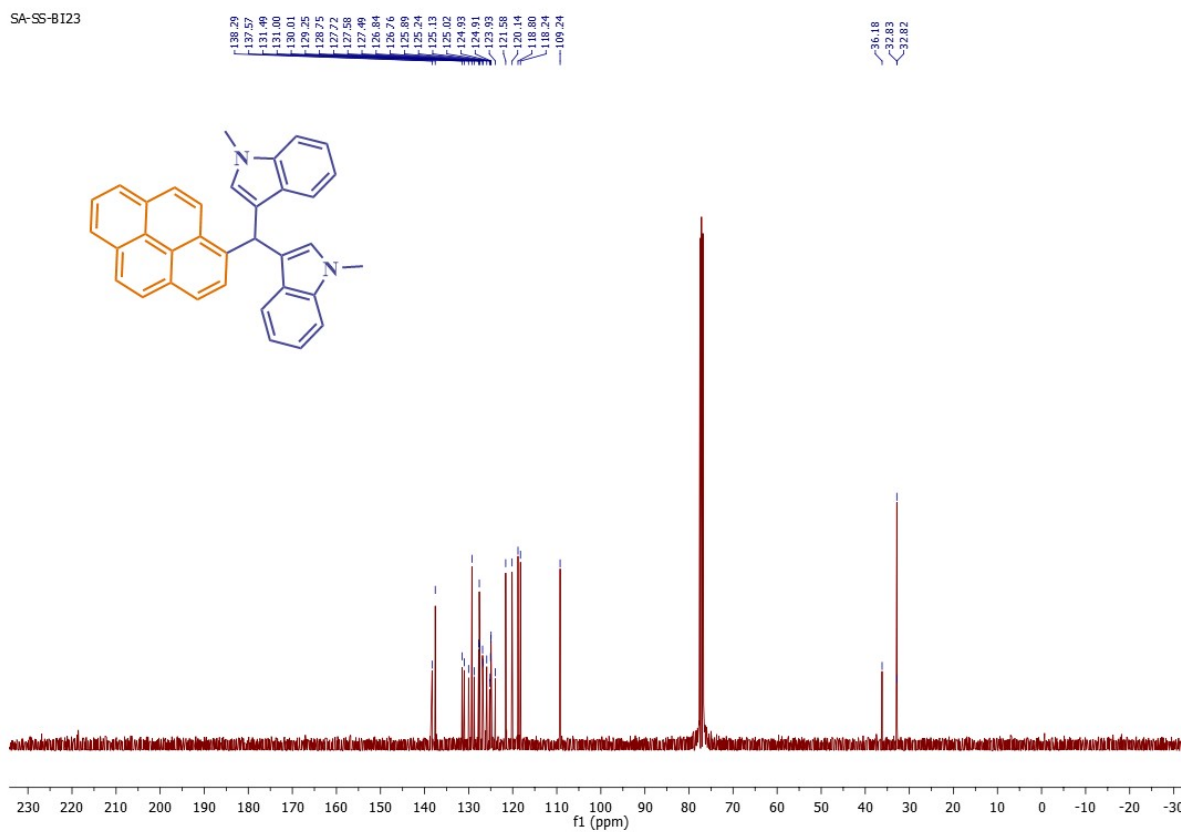

**Figure S30:** <sup>13</sup>C NMR spectrum of compound 5N.

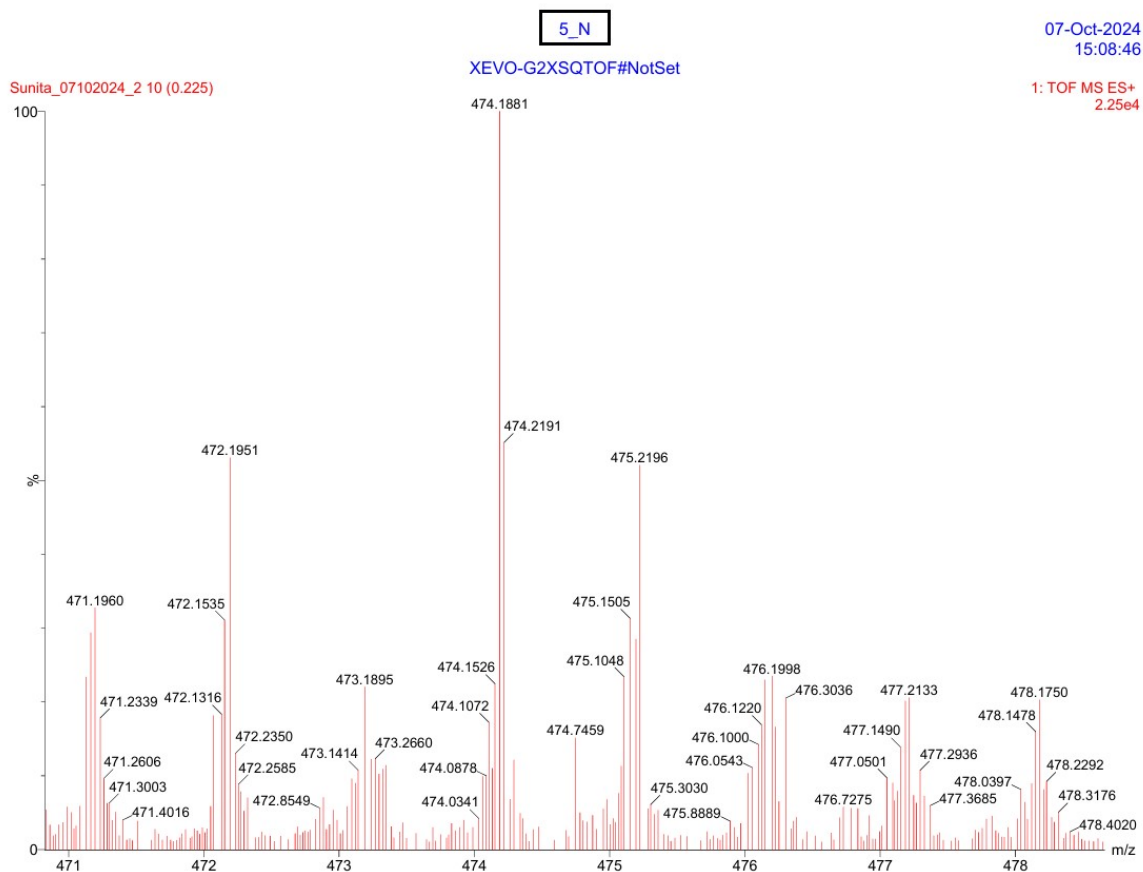

**Figure S31:** The HRMS profile of compound 5N.

SA-SS-B125

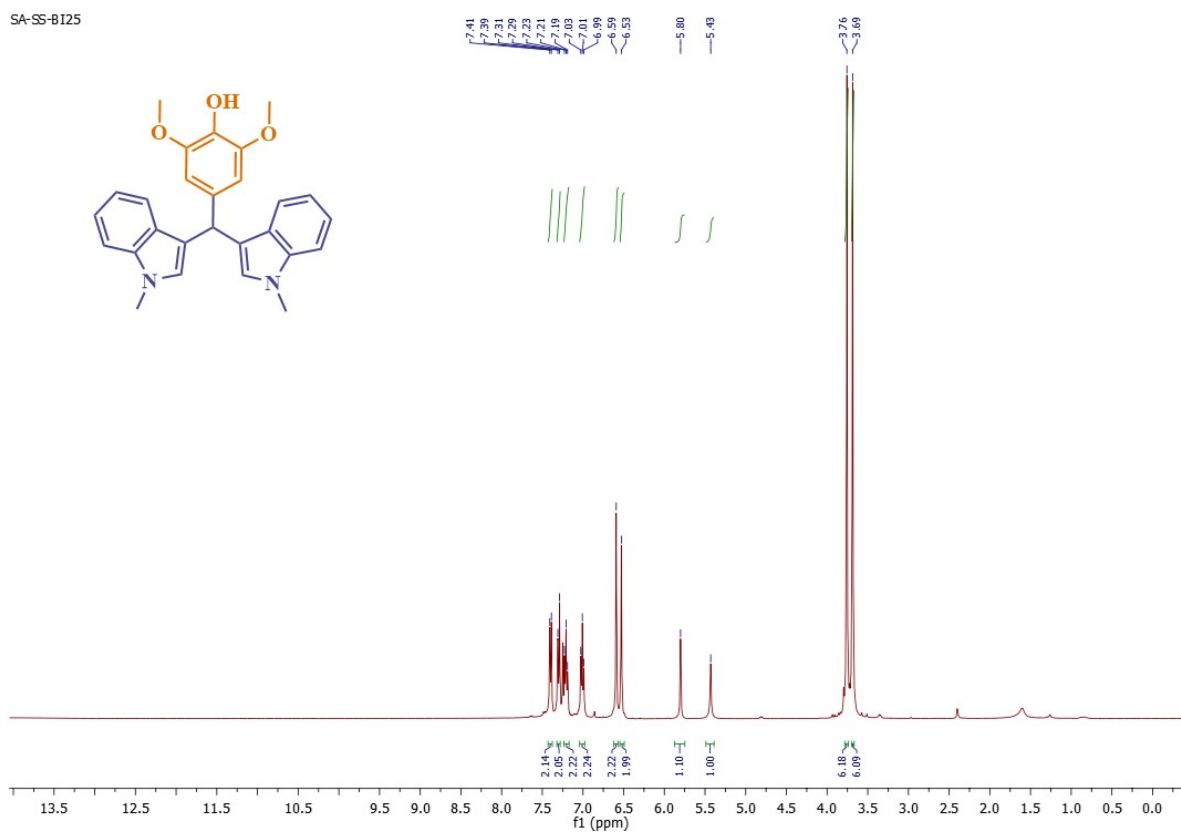**Figure S32:** <sup>1</sup>H NMR spectrum of compound 5O.

SA-SS-B125

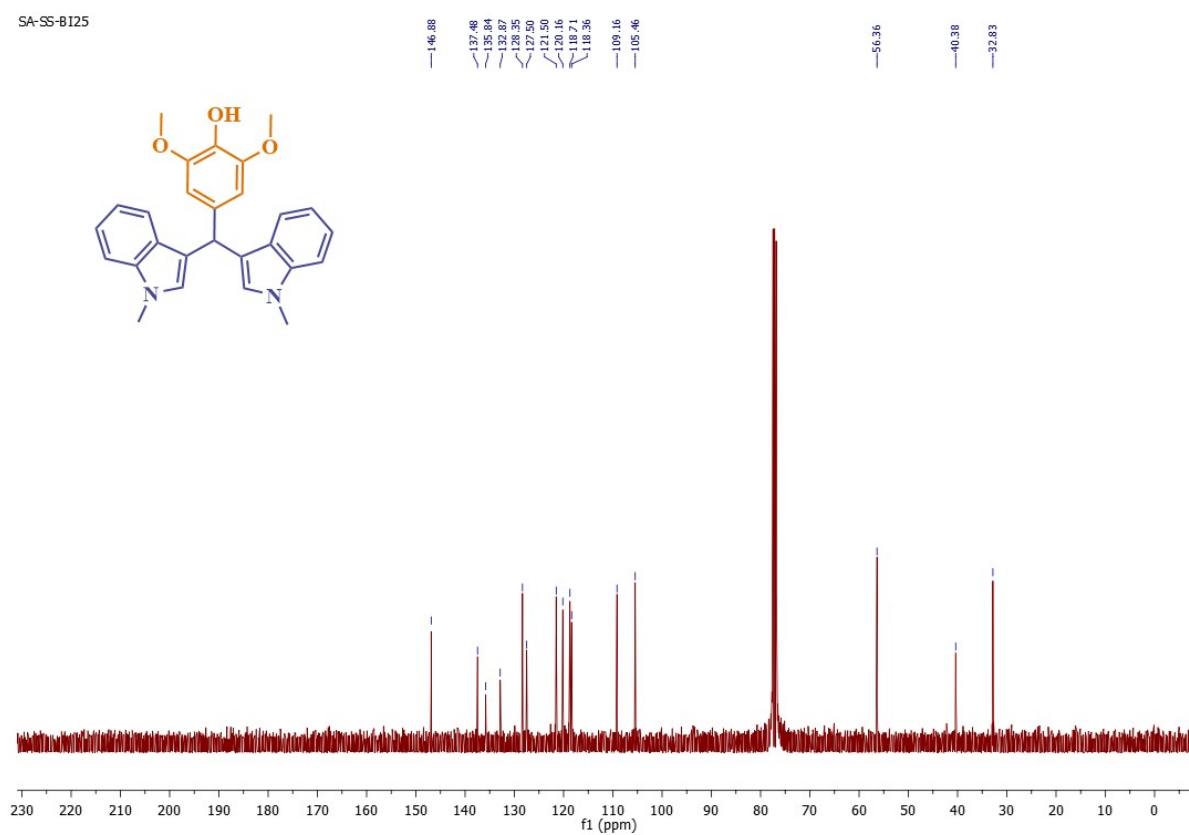**Figure S33:** <sup>13</sup>C NMR spectrum of compound 5O.

SA-SS-BI33

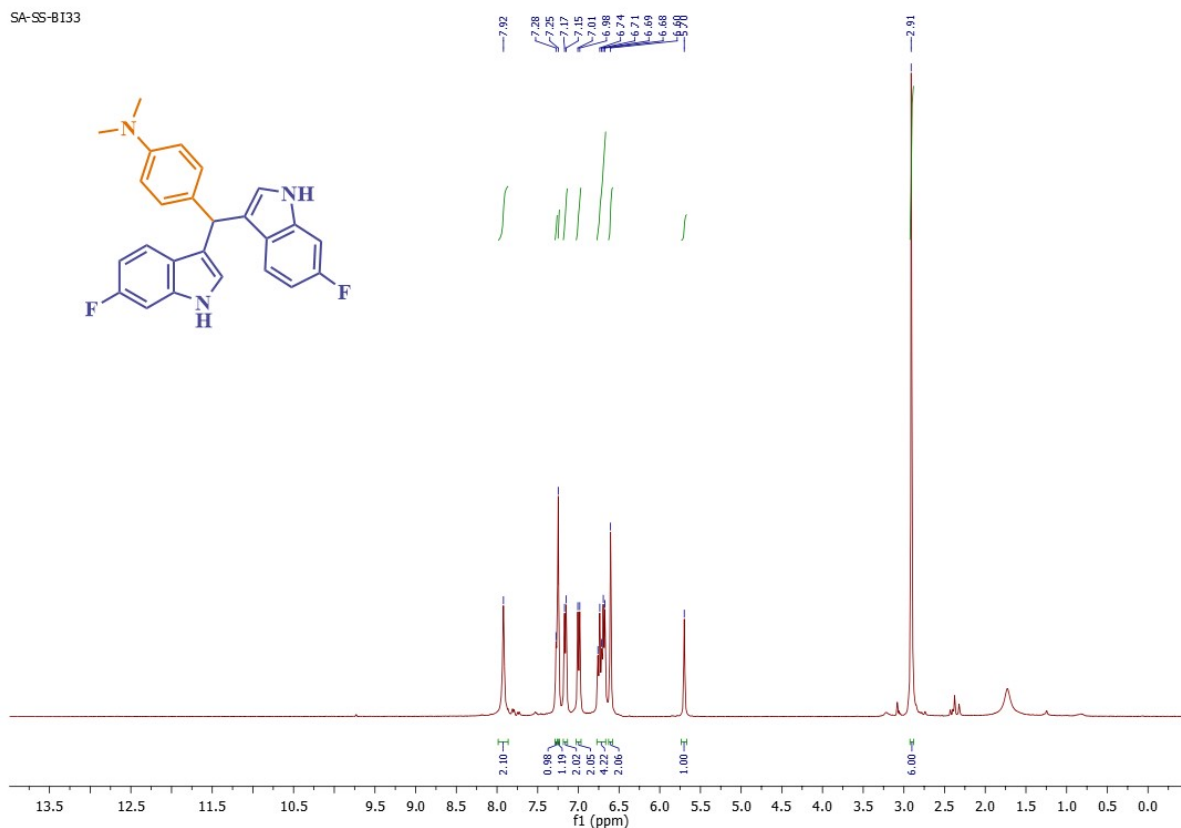

SA-SS-BI33

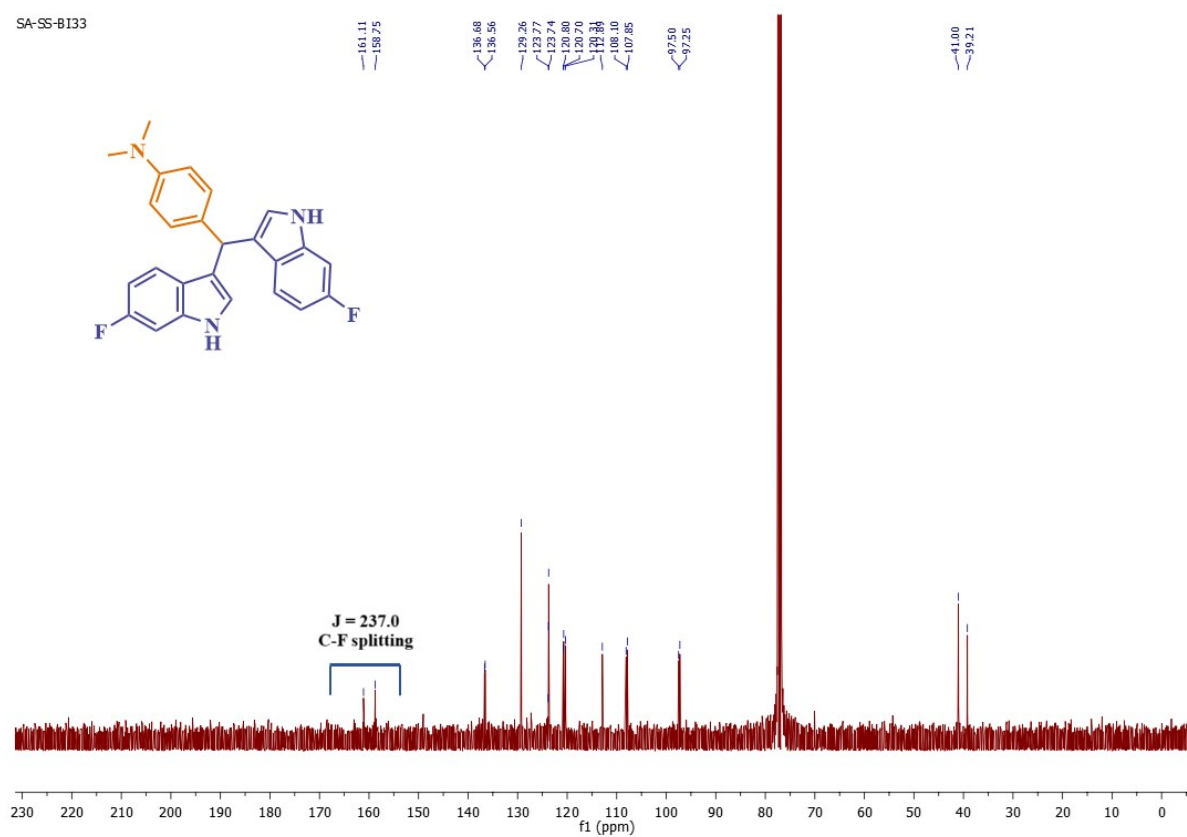

SA-SS-BI36

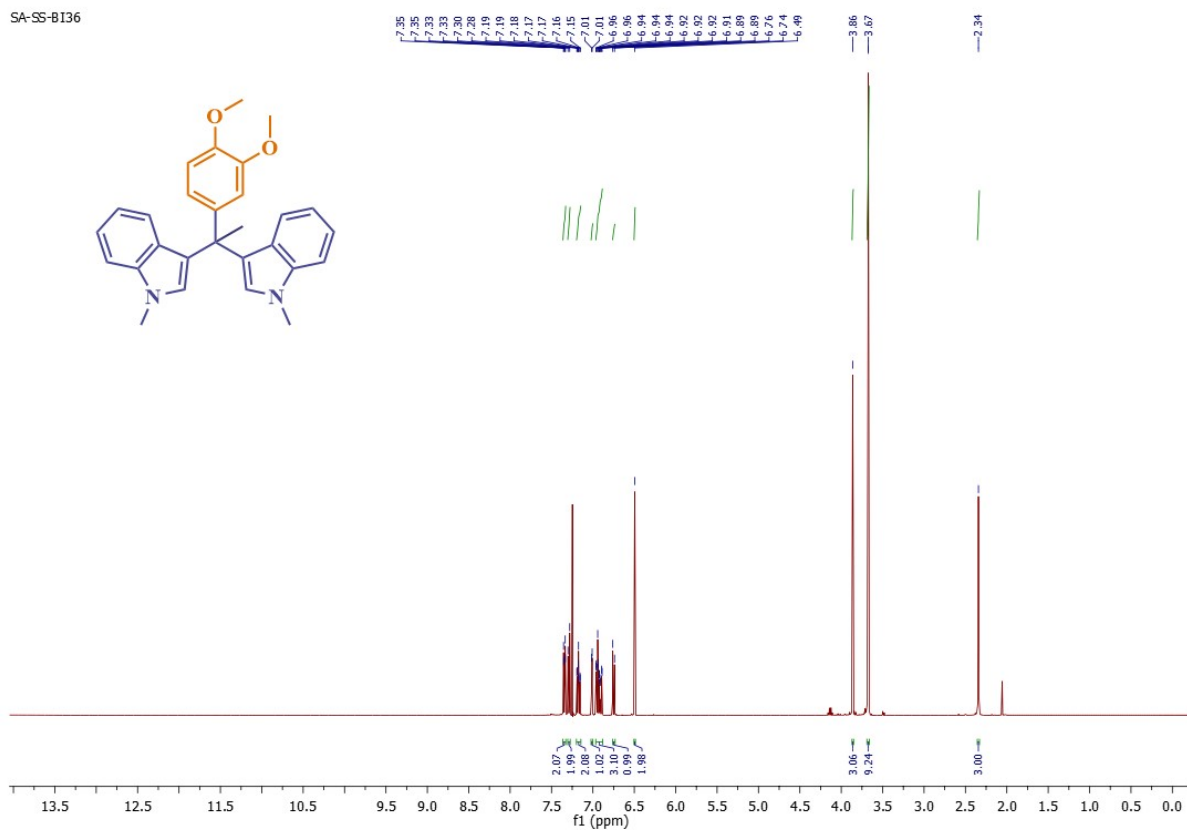Figure S36: <sup>1</sup>H NMR spectrum of compound 5Q.

SA-SS-BI36

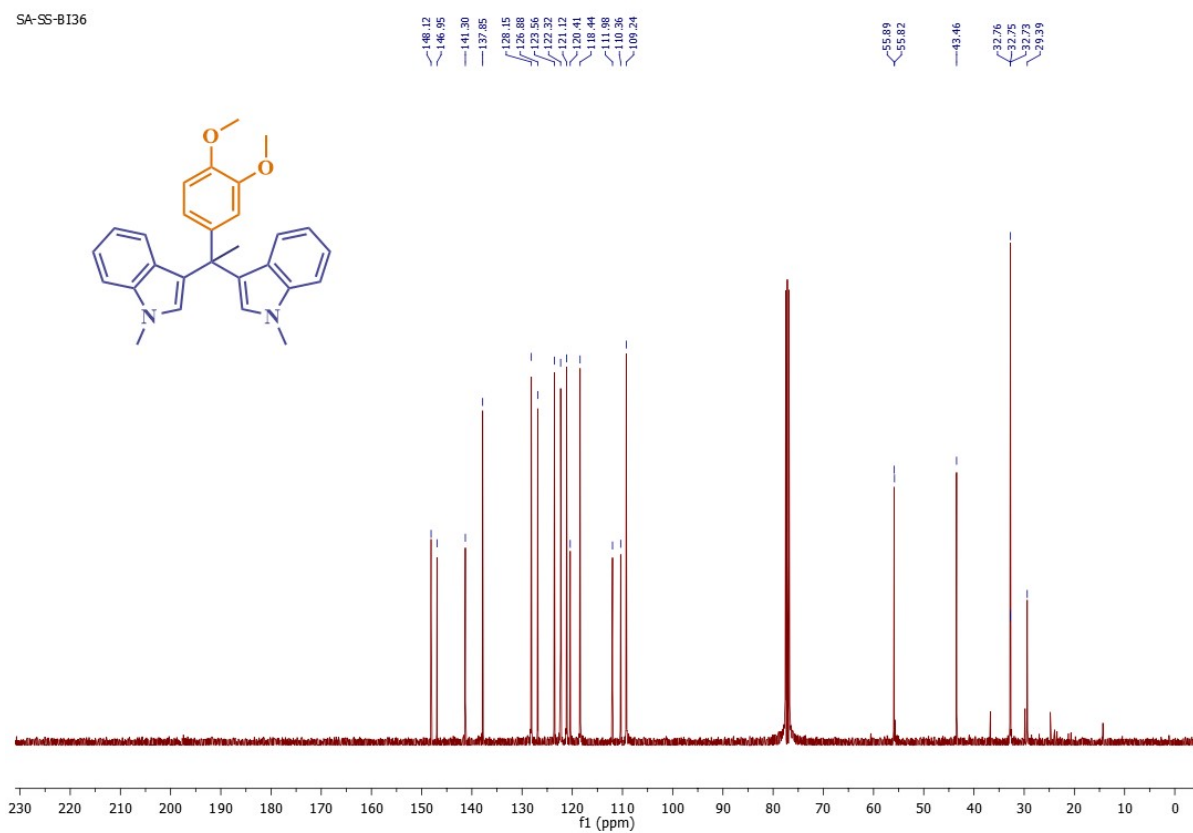Figure S37: <sup>13</sup>C NMR spectrum of compound 5Q.

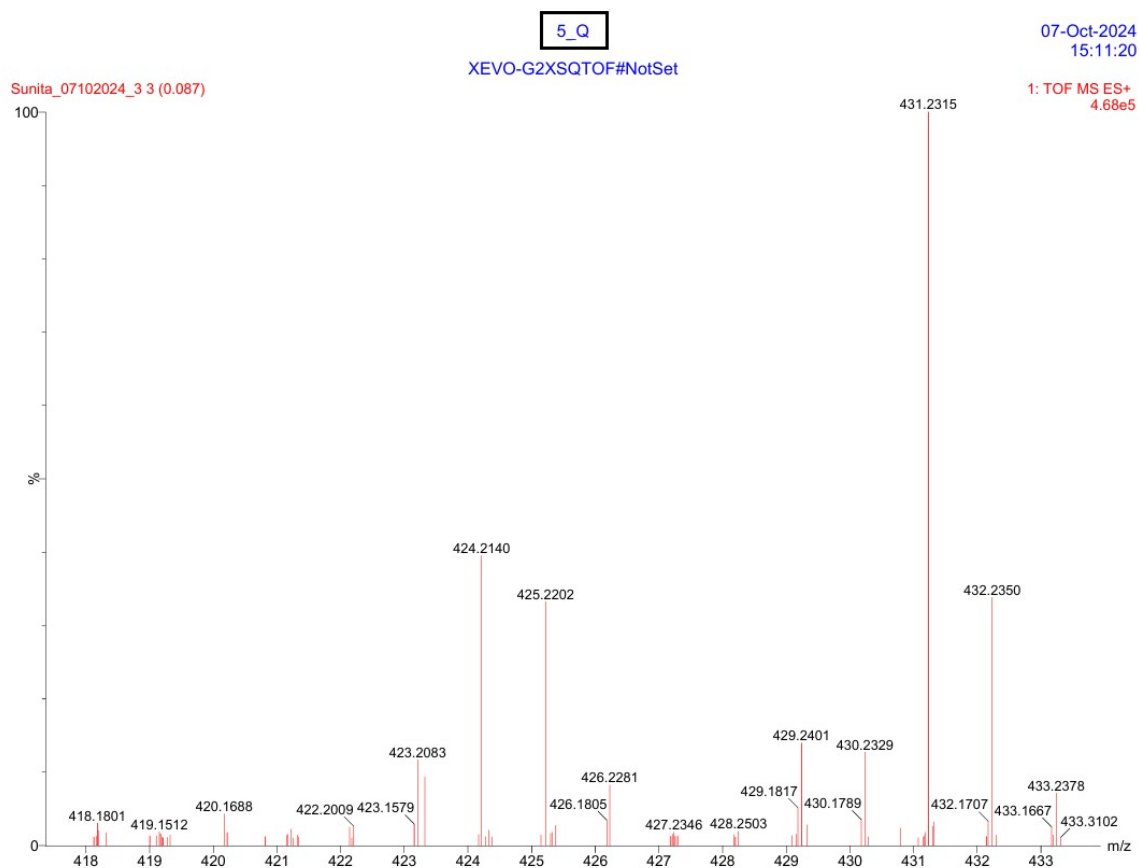

**Figure S38:** The HRMS profile of compound 5Q.

SA-SS-BI41

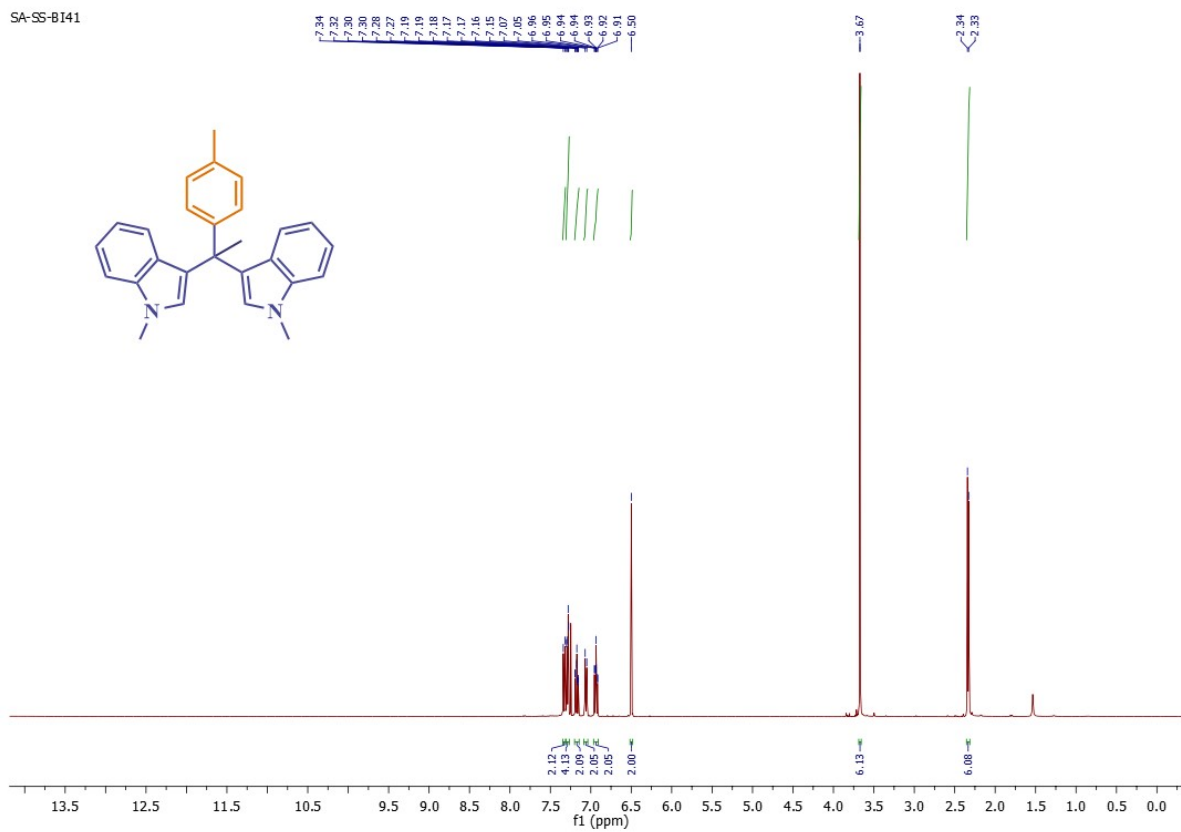Figure S39: <sup>1</sup>H NMR spectrum of compound 5R.

SA-SS-BI41

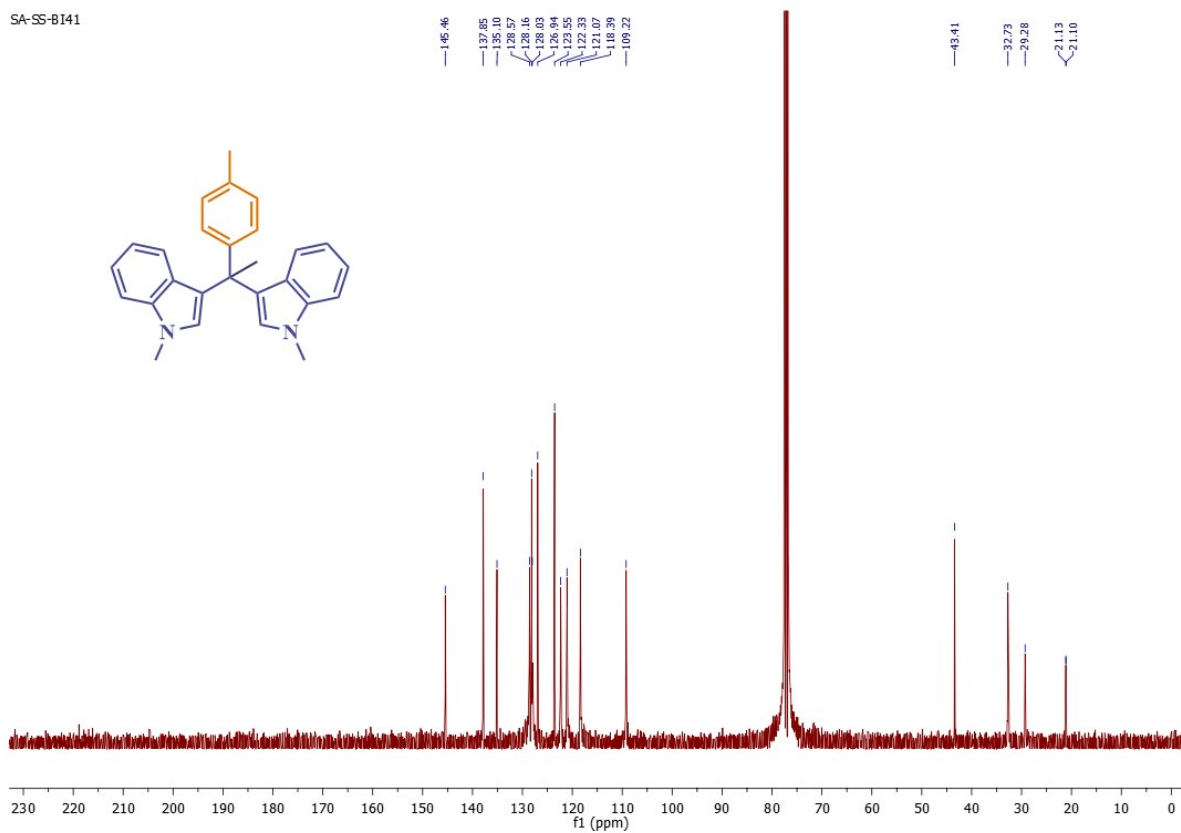Figure S40: <sup>13</sup>C NMR spectrum of compound 5R.

SA-SS-BI38

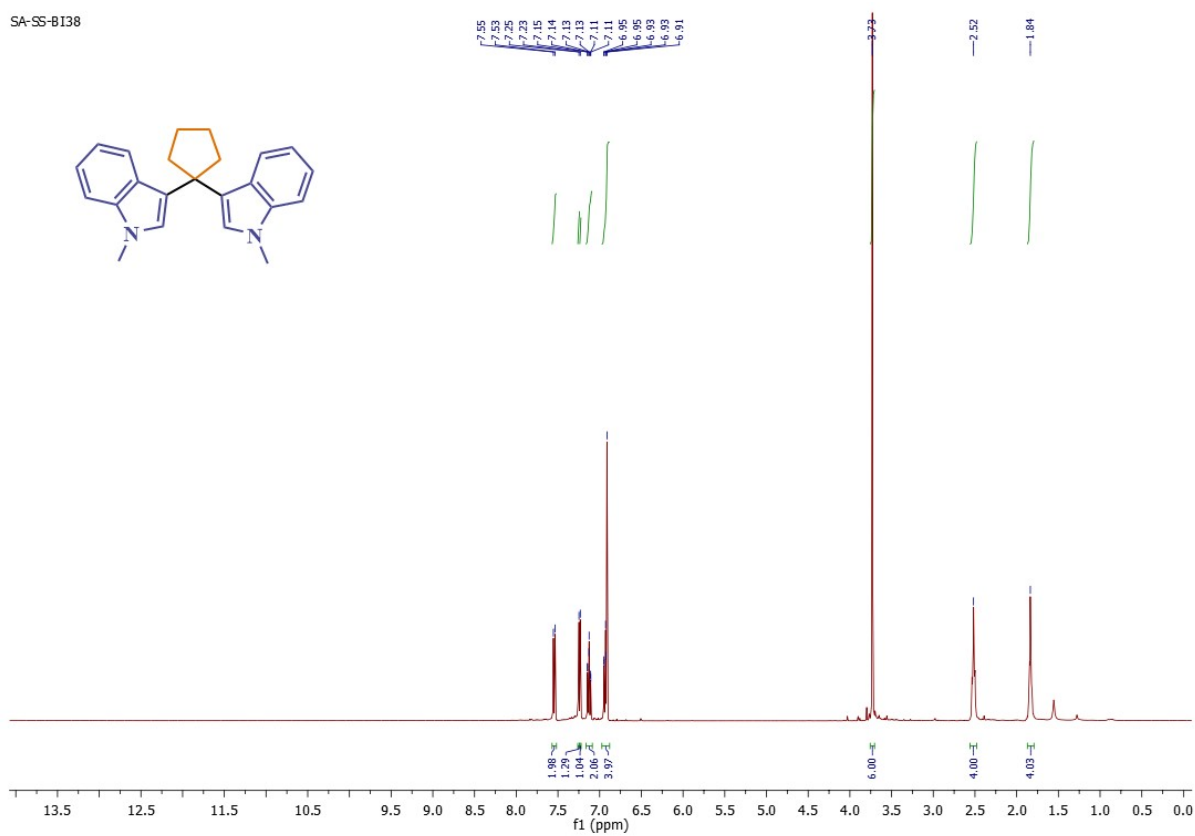

**Figure S41:** <sup>1</sup>H NMR spectrum of compound 5S.

SA-SS-BI38

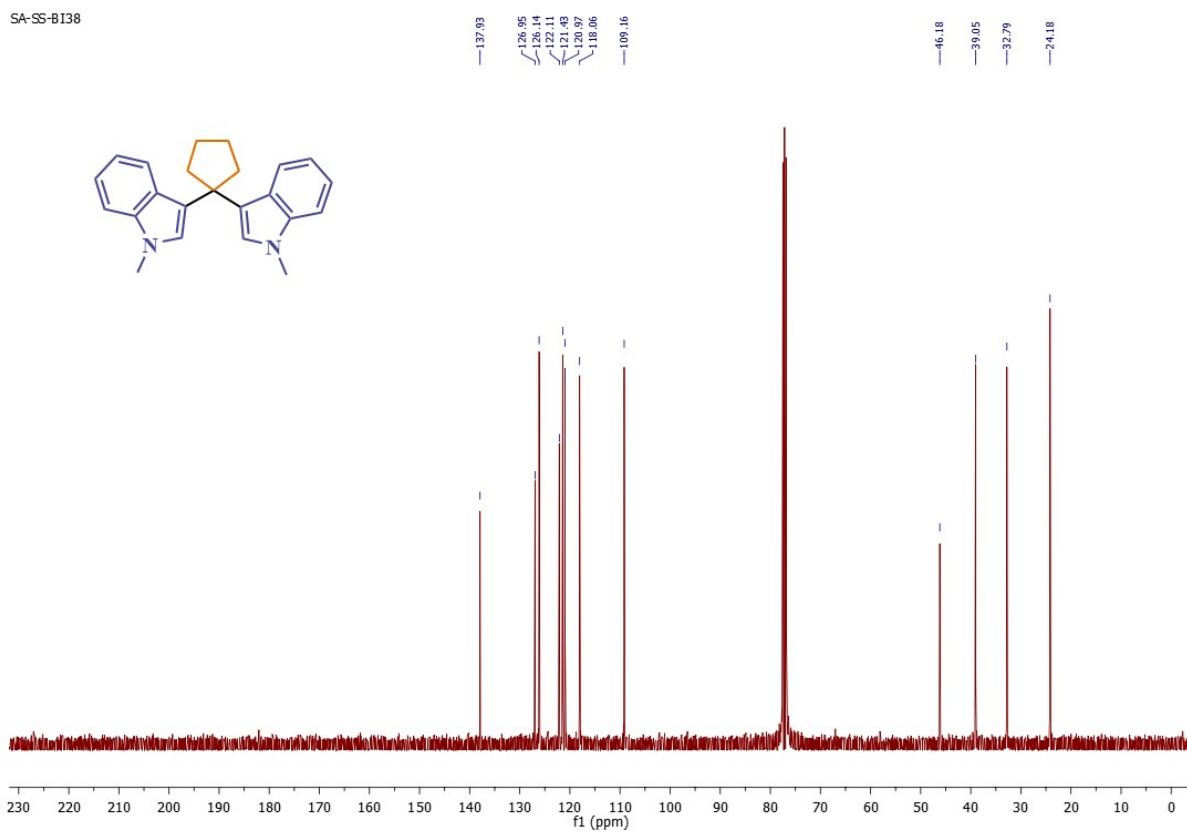

**Figure S42:** <sup>13</sup>C NMR spectrum of compound 5S.



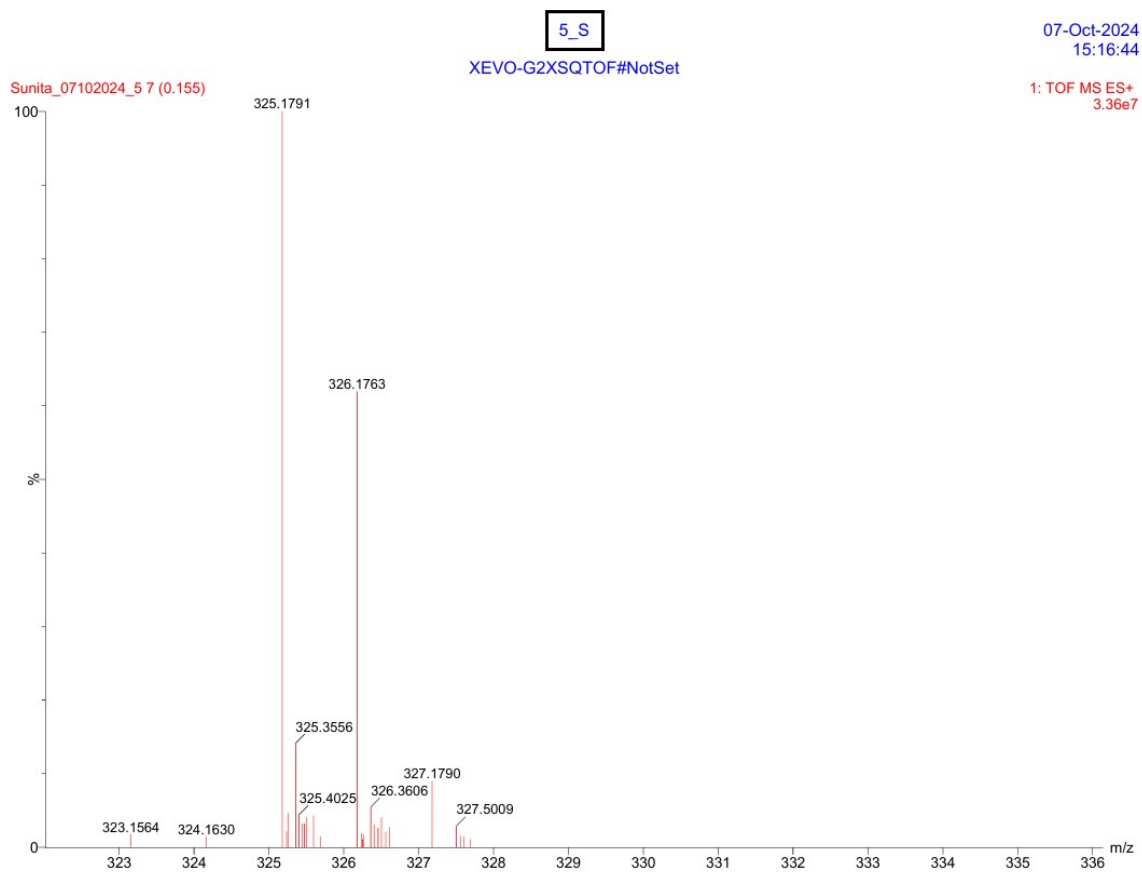

**Figure S43:** The HRMS profile of compound 5S.

SA-SS-B139

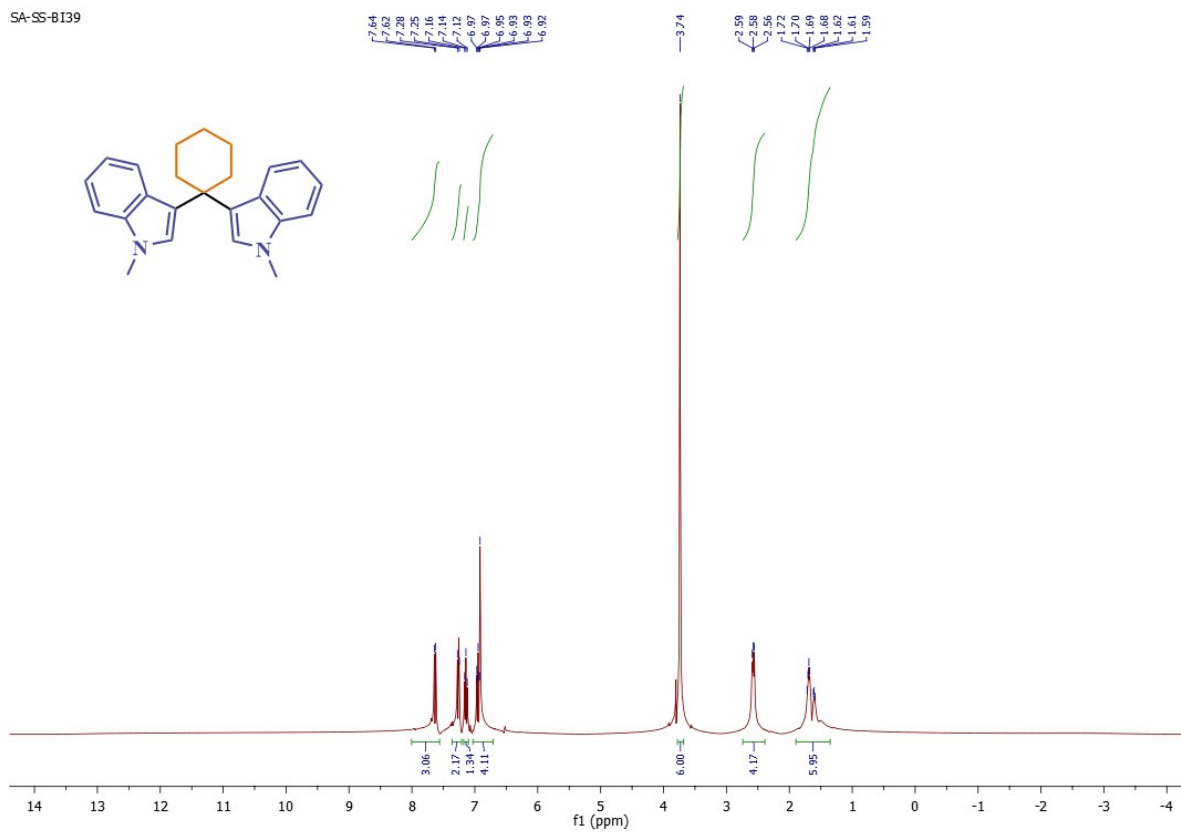Figure S44: <sup>1</sup>H NMR spectrum of compound 5T.

SA-SS-B139

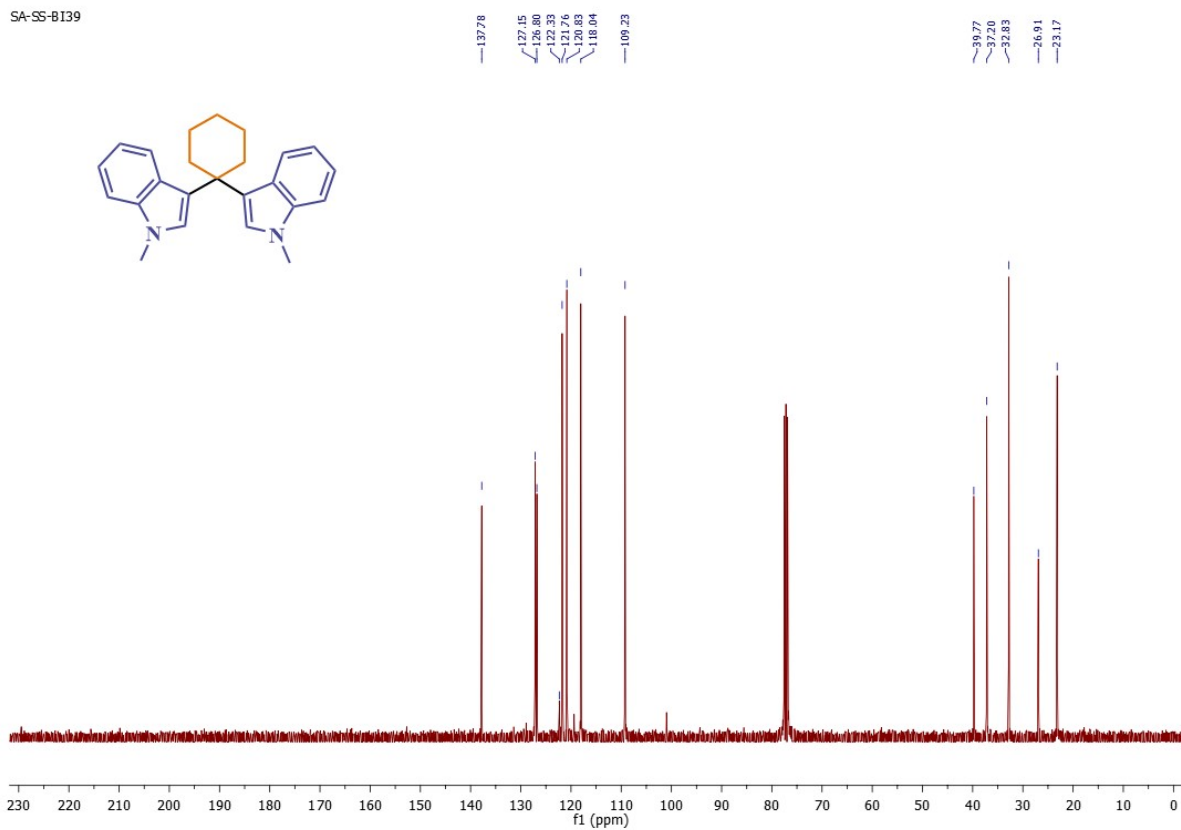Figure S45: <sup>13</sup>C NMR spectrum of compound 5T.

SA-SS-B141

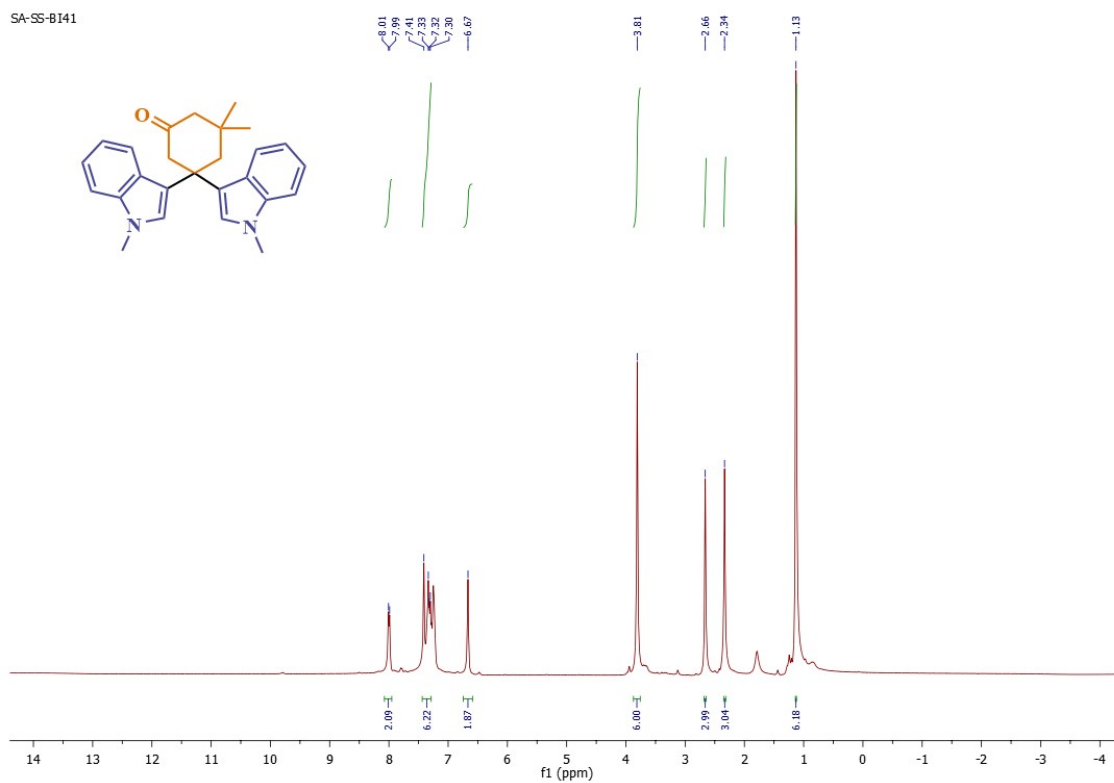Figure S46: <sup>1</sup>H NMR spectrum of compound 5U.

SA-SS-B141

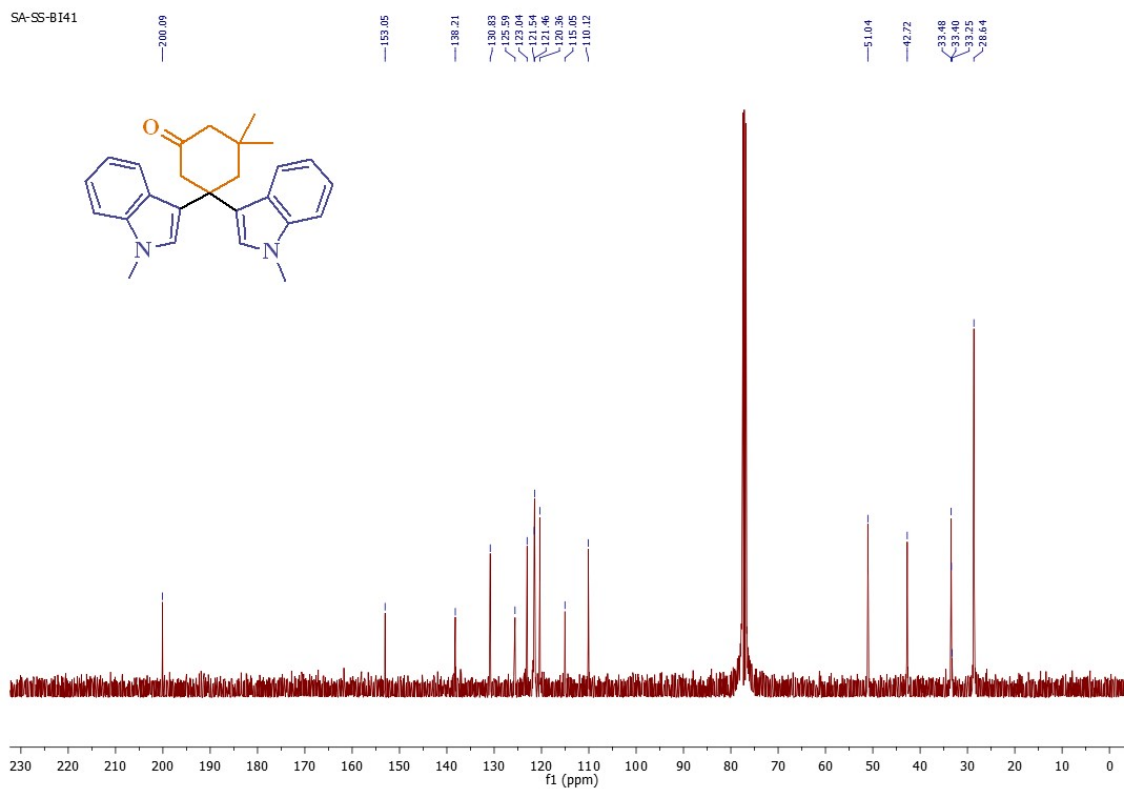Figure S47: <sup>13</sup>C NMR spectrum of compound 5U.

Fig

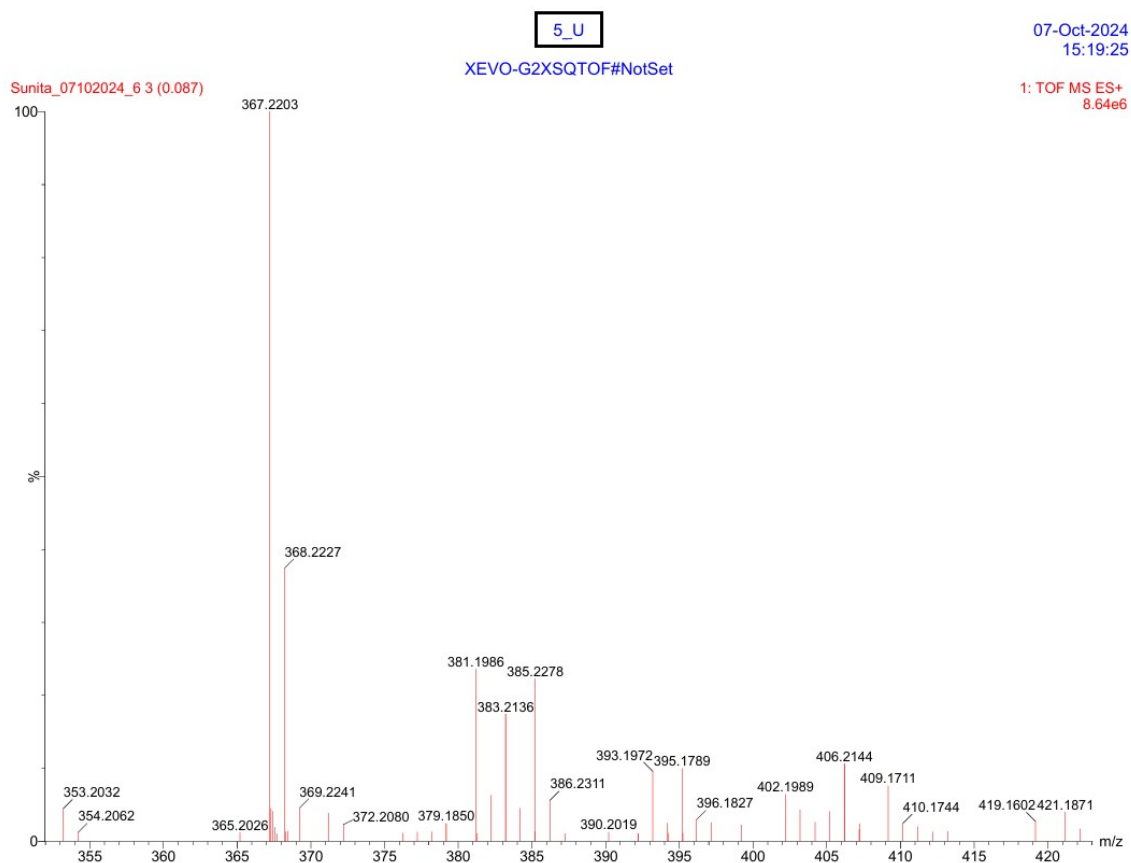

**Figure S48:** The HRMS profile of compound 5U.

## 5. References:

1. Nowak, P. M.; Wietecha-Posluszny, R.; Pawliszyn, J., White analytical chemistry: an approach to reconcile the principles of green analytical chemistry and functionality. *TrAC Trends in Analytical Chemistry* **2021**, *138*, 116223.
2. Soni, S.; Teli, S.; Teli, P.; Manhas, A.; Jha, P. C.; Agarwal, S., Highly efficient synthesis of isoxazolones and pyrazolones using g-C<sub>3</sub>N<sub>4</sub>·OH nanocomposite with their in silico molecular docking, pharmacokinetics and simulation studies. *Scientific Reports* **2024**, *14* (1), 19123.
3. Yu, J.; Shen, T.; Lin, Y.; Zhou, Y.; Song, Q., Rapid and efficient synthesis of 3, 3-di (1 *H*-indol-3-yl) indolin-2-ones and 2, 2-di (1 *H*-indol-3-yl)-2 *H*-acenaphthen-1-ones catalyzed by p-TSA. *Synthetic Communications* **2014**, *44* (14), 2029-2036.
4. Brahmachari, G.; Banerjee, B., Facile and one-pot access of 3, 3-bis (indol-3-yl) indolin-2-ones and 2, 2-bis (indol-3-yl) acenaphthylen-1 (2 *H*)-one derivatives via an eco-friendly pseudo-multicomponent reaction at room temperature using sulfamic acid as an organo-catalyst. *ACS Sustainable Chemistry & Engineering* **2014**, *2* (12), 2802-2812.
5. Huang, W.; Nang, L.; Li, X.; Yuan, L.; Ma, Y.; Liang, D., Bromine/para-Toluenesulfonic Acid-Catalyzed Synthesis of 3, 3-Bis (indole-3-yl) indoline-2-(1*H*)-ones by Condensing Indoles with Isatins. *Chinese Journal of Chemistry* **2015**, *33* (10), 1167-1172.
6. Konwar, D.; Bora, U., Free Radical Triggered Convenient Synthesis of Bis (indolyl) methane with Potassium Peroxodisulfate as Catalyst. *ChemistrySelect* **2020**, *5* (25), 7460-7466.
7. Ferrer, C.; Amijs, C. H.; Echavarren, A. M., Intra-and Intermolecular Reactions of Indoles with Alkynes Catalyzed by Gold. *Chemistry–A European Journal* **2007**, *13* (5), 1358-1373.
8. Pasupathy, S. D.; Somkuwar, P.; Kali, V.; Kalleshappa, A. K. S.; Maiti, B., Synthesis of dimeric indoles from Friedel–Crafts reaction of indoles with ketones catalysed by a Brønsted acid ionic liquid and their interactions with BSA and DNA. *New Journal of Chemistry* **2024**, *48* (34), 14904-14923.
